# Supplementary material for: Assessing an acoustic bioindicator of leisure boating disturbance on bottlenose dolphins
Source: PeerJ. 2025 Aug 1;13:e19726. doi: 10.7717/peerj.19726 (PMC12320803; doi:10.7717/peerj.19726)
Supplement: Supplemental Information 1 [file peerj-13-19726-s001.xlsx]

## Sheet: Foglio1
SW_ID	Min_freq	Max_freq	Duration	Start_Freq	End_Freq	Infl_point	CALF	BEHAVIOUR	BOAT	habitat2
SW-6-SE	6.3327	13.8487	0.468	6.391	13.715	0	ABSENT	FEEDING	ABSENT	6
SW-6-SE	5.8455	15.1556	0.704	5.75	14.837	0	ABSENT	FEEDING	ABSENT	6
SW-22-SE	1.2287	2.3669	0.636	1.206	2.367	0	ABSENT	FEEDING	ABSENT	6
SW-22-SE	1.2	2.8582	0.568	1.072	2.769	0	ABSENT	FEEDING	ABSENT	6
SW-22-SE	1.1077	2.0769	0.444	1.431	1.385	0	ABSENT	FEEDING	ABSENT	6
SW-22-SE	1.5339	2.056	0.376	1.534	1.664	0	ABSENT	FEEDING	ABSENT	6
SW-22-SE	1.6971	2.056	0.72	1.828	1.893	0	ABSENT	FEEDING	ABSENT	6
SW-22-SE	1.5231	2.2105	0.443	2.008	2.179	1	ABSENT	FEEDING	ABSENT	6
SW-22-SE	1.3054	2.2192	0.479	2.211	2.147	1	ABSENT	FEEDING	ABSENT	6
SW-22-SE	1.4526	2.2154	0.561	1.569	1.832	0	ABSENT	FEEDING	ABSENT	6
SW-22-SE	1.3846	1.9579	0.603	1.421	1.662	0	ABSENT	FEEDING	ABSENT	6
SW-22-SE	1.5012	2.0234	0.577	1.632	1.762	0	ABSENT	FEEDING	ABSENT	6
SW-22-SE	1.4738	2.2106	0.435	1.474	2.166	0	ABSENT	FEEDING	ABSENT	6
SW-22-SE	1.5692	2.4116	0.509	1.662	2.412	0	ABSENT	FEEDING	ABSENT	6
SW-26-CML	5.1679	16.4672	3.194	5.073	14.978	8	PRESENT	FEEDING	ABSENT	6
SW-26-CML	5.0168	15.7318	2.314	4.955	13.564	4	PRESENT	FEEDING	ABSENT	6
SW-26-CML	4.2158	15.7664	5.323	7.003	13.219	12	PRESENT	FEEDING	ABSENT	6
SW-26-CML	3.1533	16.9051	3.537	4.73	16.818	8	PRESENT	FEEDING	ABSENT	6
SW-34-SE	6.49623	18.0361	0.84	6.567	17.965	1	PRESENT	FEEDING	ABSENT	6
SW-34-SE	6.70862	14.9918	0.9508	6.779	14.921	1	PRESENT	FEEDING	ABSENT	6
SW-34-SE	9.2573	19.9476	0.8904	9.328	19.735	1	PRESENT	FEEDING	ABSENT	6
SW-34-SE	6.70862	19.098	0.973	6.779	18.956	1	PRESENT	FEEDING	ABSENT	6
SW-34-SE	7.27499	13.8015	0.6487	7.275	13.647	1	PRESENT	FEEDING	ABSENT	6
SW-34-SE	6.56703	21.3635	0.8018	6.638	21.293	1	PRESENT	FEEDING	ABSENT	6
SW-34-SE	7.91216	19.1756	0.8098	7.983	13.027	1	PRESENT	FEEDING	ABSENT	6
SW-37-CML	6.04421	20.2343	1.6638	6.044	16.064	5	ABSENT	FEEDING	ABSENT	6
SW-37-CML	6.41391	20.8083	2.1316	6.508	8.366	4	PRESENT	FEEDING	ABSENT	6
SW-37-CML	6.42336	22.3066	0.7575	6.568	22.22	1	PRESENT	FEEDING	ABSENT	6
SW-37-CML	5.83942	22.3066	0.7333	6.077	22.22	1	PRESENT	FEEDING	ABSENT	6
SW-37-CML	5.67194	23.8248	1.0847	5.733	14.388	2	PRESENT	FEEDING	ABSENT	6
SW-37-CML	6.65693	24.1752	0.8514	6.838	12.976	2	PRESENT	FEEDING	ABSENT	6
SW-37-CML	5.9384	27.5092	0.7228	5.938	27.086	1	PRESENT	FEEDING	ABSENT	6
SW-37-CML	6.30657	23.9516	2.0588	6.463	9.378	4	PRESENT	FEEDING	ABSENT	6
SW-37-CML	7.65707	17.8306	0.6403	7.832	17.655	1	PRESENT	FEEDING	ABSENT	6
SW-37-CML	7.06977	21.9535	2.5232	8.558	10.977	6	PRESENT	FEEDING	ABSENT	6
SW-37-CML	5.89953	22.5799	1.4227	6.391	22.296	4	PRESENT	FEEDING	ABSENT	6
SW-37-CML	6.18978	18.9197	0.7232	6.202	18.853	1	PRESENT	FEEDING	ABSENT	6
SW-37-CML	6.32558	18.1705	0.7779	6.45	17.984	1	PRESENT	FEEDING	ABSENT	6
SW-61-CML	6.78871	12.1935	0.9428	7.412	6.913	4	PRESENT	FEEDING	ABSENT	6
SW-61-CML	6.9133	14.1931	0.9871	6.98	10.005	5	PRESENT	FEEDING	ABSENT	6
SW-61-CML	7.24571	14.8	1.4666	7.246	11.168	7	PRESENT	FEEDING	ABSENT	6
SW-61-CML	7.00262	16.5041	1.2671	7.108	7.355	6	PRESENT	FEEDING	ABSENT	6
SW-12-SE	6.1991	24.0515	0.659	6.275	24.027	0	ABSENT	SOCIAL	ABSENT	6
SW-12-SE	6.1624	24.3076	0.873	6.529	24.156	0	ABSENT	SOCIAL	ABSENT	6
SW-12-SE	6.9696	24.0176	0.765	6.818	23.904	0	ABSENT	SOCIAL	ABSENT	6
SW-12-SE	6.6625	19.5981	0.704	6.625	19.464	0	ABSENT	SOCIAL	ABSENT	6
SW-16-SE	8.2998	20.3883	0.567	8.302	20.369	0	ABSENT	SOCIAL	ABSENT	6
SW-16-SE	7.2372	17.4289	0.519	7.332	17.134	0	ABSENT	SOCIAL	ABSENT	6
SW-16-SE	6.817	19.4144	0.481	6.741	19.036	0	ABSENT	SOCIAL	ABSENT	6
SW-16-SE	5.7843	14.1023	0.504	5.849	14.051	0	ABSENT	SOCIAL	ABSENT	6
SW-16-SE	5.9661	16.3221	0.41	5.994	16.337	0	ABSENT	SOCIAL	ABSENT	6
SW-16-SE	8.0656	14.0753	0.404	8.111	14	0	ABSENT	SOCIAL	ABSENT	6
SW-16-SE	6.7143	16.3936	0.607	6.733	16.365	0	ABSENT	SOCIAL	ABSENT	6
SW-16-SE	6.4173	15.4793	0.669	6.391	14.207	1	ABSENT	SOCIAL	ABSENT	6
SW-16-SE	8.4123	20.2808	0.698	8.259	20.319	0	ABSENT	SOCIAL	ABSENT	6
SW-16-SE	8.2285	15.0297	0.537	8.12	14.895	0	ABSENT	SOCIAL	ABSENT	6
SW-16-SE	7.3332	14.9785	0.628	7.18	14.864	0	ABSENT	SOCIAL	ABSENT	6
SW-1-SE	9.3989	13.7718	0.385	9.297	13.696	0	PRESENT	SOCIAL	ABSENT	6
SW-1-SE	6.3337	15.2861	1	8.561	11.442	2	ABSENT	SOCIAL	ABSENT	6
SW-1-SE	7.2826	14.0552	1	7.535	8.856	4	ABSENT	SOCIAL	ABSENT	6
SW-1-SE	7.4872	11.9459	0.991	8.376	9.918	2	ABSENT	SOCIAL	ABSENT	6
SW-5-SE	7.45865	15.1473	0.9925	10.694	7.444	1	PRESENT	SOCIAL	ABSENT	6
SW-5-SE	7.65957	14.7234	0.9848	11.489	8.255	1	PRESENT	SOCIAL	ABSENT	6
SW-7-SE	3.5732	14.8883	0.047	7.23	14.888	0	PRESENT	SOCIAL	ABSENT	6
SW-7-SE	5.6428	14.5703	0.07	5.643	14.57	0	PRESENT	SOCIAL	ABSENT	6
SW-7-SE	10.1516	13.6546	0.207	11.49	13.67	1	ABSENT	SOCIAL	ABSENT	6
SW-7-SE	8.9863	12.3337	0.154	9.726	12.217	1	ABSENT	SOCIAL	ABSENT	6
SW-9-SE	5.6727	17.1927	0.7952	5.847	17.193	0	PRESENT	SOCIAL	ABSENT	6
SW-9-SE	4.6422	16.8184	0.9831	4.713	16.59	0	PRESENT	SOCIAL	ABSENT	6
SW-9-SE	5.139	17.0884	0.8381	5.498	16.612	1	PRESENT	SOCIAL	ABSENT	6
SW-9-SE	4.8169	16.0563	0.8286	5.07	15.972	1	PRESENT	SOCIAL	ABSENT	6
SW-9-SE	5.4378	13.8035	0.6294	5.617	13.744	1	PRESENT	SOCIAL	ABSENT	6
SW-9-SE	4.4817	16.3731	0.8805	4.721	16.313	1	PRESENT	SOCIAL	ABSENT	6
SW-9-SE	4.4555	17.1987	0.9483	4.701	17.076	1	PRESENT	SOCIAL	ABSENT	6
SW-9-SE	4.4584	16.9346	0.914	4.554	16.744	1	PRESENT	SOCIAL	ABSENT	6
SW-9-SE	4.6723	16.6594	0.9174	4.807	16.592	1	PRESENT	SOCIAL	ABSENT	6
SW-9-SE	4.5353	16.5897	0.8906	4.805	16.59	1	PRESENT	SOCIAL	ABSENT	6
SW-9-SE	5.7439	13.2931	0.5893	5.925	13.233	0	PRESENT	SOCIAL	ABSENT	6
SW-9-SE	4.838	15.1049	0.7332	4.898	15.044	0	PRESENT	SOCIAL	ABSENT	6
SW-9-SE	4.7107	13.6489	0.7265	4.771	13.589	0	PRESENT	SOCIAL	ABSENT	6
SW-9-SE	4.7251	13.9294	0.7008	4.925	13.643	0	PRESENT	SOCIAL	ABSENT	6
SW-9-SE	4.3636	17.2063	1.017	4.455	17.278	0	PRESENT	SOCIAL	ABSENT	6
SW-9-SE	4.5755	15.0849	0.7532	4.921	15.022	0	PRESENT	SOCIAL	ABSENT	6
SW-9-SE	4.9061	12.1989	0.6629	5.053	12.042	0	PRESENT	SOCIAL	ABSENT	6
SW-9-SE	4.9684	10.5263	0.5114	5.053	10.442	0	PRESENT	SOCIAL	ABSENT	6
SW-9-SE	4.8842	12.8	0.696	5.053	12.716	0	PRESENT	SOCIAL	ABSENT	6
SW-9-SE	4.7394	16.3352	0.786	4.749	16.145	0	PRESENT	SOCIAL	ABSENT	6
SW-9-SE	4.4854	14.5577	0.7765	4.534	14.336	0	PRESENT	SOCIAL	ABSENT	6
SW-9-SE	4.4854	12.2724	0.8428	4.656	12.131	0	PRESENT	SOCIAL	ABSENT	6
SW-9-SE	4.7394	10.9182	0.5777	4.779	10.783	0	PRESENT	SOCIAL	ABSENT	6
SW-9-SE	8.1066	21.4563	0.865	8.257	21.296	0	ABSENT	SOCIAL	ABSENT	6
SW-9-SE	8.2559	16.9073	0.565	8.358	15.923	0	ABSENT	SOCIAL	ABSENT	6
SW-9-SE	6.1126	16.2788	0.657	6.457	16.231	1	ABSENT	SOCIAL	ABSENT	6
SW-11-CML	9.2589	20.5888	1.752	11.33	9.137	7	PRESENT	SOCIAL	ABSENT	6
SW-11-CML	10.0223	21.0553	1.522	11.851	10.005	7	PRESENT	SOCIAL	ABSENT	6
SW-11-CML	10.005	19.1269	0.846	12.061	9.99	3	PRESENT	SOCIAL	ABSENT	6
SW-11-CML	9.4094	20.3672	0.472	11.208	9.381	1	PRESENT	SOCIAL	ABSENT	6
SW-11-CML	9.9898	20.7107	2.006	11.208	20.589	8	PRESENT	SOCIAL	ABSENT	6
SW-14-SE	6.5672	16.9327	1.221	7.377	11.815	2	ABSENT	SOCIAL	ABSENT	6
SW-14-SE	6.641	14.595	1.472	9.741	14.523	3	ABSENT	SOCIAL	ABSENT	6
SW-14-SE	6.996	17.3259	1.346	9.833	13.465	3	ABSENT	SOCIAL	ABSENT	6
SW-14-SE	6.5971	20.5008	1.494	9.169	20.442	3	ABSENT	SOCIAL	ABSENT	6
SW-14-SE	6.5325	17.8888	0.752	8.461	17.748	1	ABSENT	SOCIAL	ABSENT	6
SW-14-SE	6.2989	16.8785	1.245	9.31	16.844	3	ABSENT	SOCIAL	ABSENT	6
SW-14-SE	7.1053	15.7229	1.107	7.776	10.811	2	ABSENT	SOCIAL	ABSENT	6
SW-14-SE	8.6277	16.8795	0.958	9.057	16.374	2	ABSENT	SOCIAL	ABSENT	6
SW-14-SE	7.2778	20.2774	1.622	8.201	20.206	4	ABSENT	SOCIAL	ABSENT	6
SW-14-SE	7.2762	20.8579	1.249	9.845	7.043	4	ABSENT	SOCIAL	ABSENT	6
SW-14-SE	6.0155	11.3285	0.5157	7.194	10.977	2	PRESENT	SOCIAL	ABSENT	6
SW-14-SE	5.70543	10.1705	0.4644	6.822	10.047	2	PRESENT	SOCIAL	ABSENT	6
SW-14-SE	6.13953	10.2774	0.368	6.574	9.922	2	PRESENT	SOCIAL	ABSENT	6
SW-14-SE	6.32558	11.2117	0.5031	7.442	11.163	2	PRESENT	SOCIAL	ABSENT	6
SW-14-SE	5.95349	11.2117	0.4206	6.698	11.039	2	PRESENT	SOCIAL	ABSENT	6
SW-18-CML	9.1221	21.0832	0.978	9.653	20.932	4	ABSENT	SOCIAL	ABSENT	6
SW-18-CML	9.4397	15.7457	0.519	9.71	15.496	3	ABSENT	SOCIAL	ABSENT	6
SW-18-CML	7.20793	18.4304	1.8009	7.299	18.157	4	PRESENT	SOCIAL	ABSENT	6
SW-18-CML	7.8466	18.3559	1.4989	8.303	16.149	4	PRESENT	SOCIAL	ABSENT	6
SW-18-CML	7.14549	18.703	0.9408	7.145	16.6	2	PRESENT	SOCIAL	ABSENT	6
SW-18-CML	9.08331	18.0677	1.7678	11.491	12.137	6	PRESENT	SOCIAL	ABSENT	6
SW-18-CML	7.29917	17.6092	1.5846	9.033	15.328	4	PRESENT	SOCIAL	ABSENT	6
SW-18-CML	9.42365	17.0105	1.2088	9.663	12.698	5	PRESENT	SOCIAL	ABSENT	6
SW-18-CML	8.10899	17.6567	1.2518	9.613	15.891	4	PRESENT	SOCIAL	ABSENT	6
SW-23-SE	1.3234	7.9404	0.39	1.323	7.785	2	ABSENT	SOCIAL	ABSENT	6
SW-23-SE	1.2455	7.5511	0.359	1.09	7.395	2	ABSENT	SOCIAL	ABSENT	6
SW-23-SE	1.4012	9.3416	0.387	1.401	9.186	2	ABSENT	SOCIAL	ABSENT	6
SW-24-SE	5.9797	18.1075	0.871	8.506	18.108	1	PRESENT	SOCIAL	ABSENT	6
SW-26-CML	4.12717	17.5959	1.8449	4.179	7.88	5	PRESENT	SOCIAL	ABSENT	6
SW-26-CML	5.02894	16.3031	1.2538	5.022	9.657	4	PRESENT	SOCIAL	ABSENT	6
SW-26-CML	4.24456	17.6241	1.1167	4.269	16.527	2	PRESENT	SOCIAL	ABSENT	6
SW-26-CML	4.79721	17.1827	1.2474	4.797	8.301	3	PRESENT	SOCIAL	ABSENT	6
SW-26-CML	5.18426	18.1322	1.2879	5.247	8.327	3	PRESENT	SOCIAL	ABSENT	6
SW-26-CML	5.0751	16.3888	1.1215	5.075	16.263	2	PRESENT	SOCIAL	ABSENT	6
SW-26-CML	4.55873	16.0214	0.6629	4.661	7.558	1	PRESENT	SOCIAL	ABSENT	6
SW-26-CML	7.2	19.0133	0.7779	7.697	12.257	2	PRESENT	SOCIAL	ABSENT	6
SW-26-CML	4.3474	17.8549	1.6804	7.089	8.37	5	PRESENT	SOCIAL	ABSENT	6
SW-26-CML	4.81661	16.3246	0.672	4.9	7.64	1	PRESENT	SOCIAL	ABSENT	6
SW-26-CML	4.83943	16.114	0.8236	4.898	11.886	2	PRESENT	SOCIAL	ABSENT	6
SW-26-CML	6.38849	15.0216	0.6124	6.475	7.856	1	PRESENT	SOCIAL	ABSENT	6
SW-26-CML	5.49565	15.3565	1.1837	5.539	7.757	3	PRESENT	SOCIAL	ABSENT	6
SW-26-CML	6.21049	15.3231	1.1127	8.39	7.201	3	PRESENT	SOCIAL	ABSENT	6
SW-26-CML	6.82598	15.5795	1.1316	6.826	14.454	2	PRESENT	SOCIAL	ABSENT	6
SW-26-CML	5.8913	15.413	1.212	7.457	7.109	3	PRESENT	SOCIAL	ABSENT	6
SW-26-CML	5.38671	16.3861	0.8021	5.387	10.415	2	PRESENT	SOCIAL	ABSENT	6
SW-26-CML	4.42553	21.1306	1.482	4.875	21.046	4	PRESENT	SOCIAL	ABSENT	6
SW-26-CML	4.47887	19.6056	1.5009	4.563	10.31	5	PRESENT	SOCIAL	ABSENT	6
SW-26-CML	2.4507	17.493	1.16	2.535	15.803	4	PRESENT	SOCIAL	ABSENT	6
SW-26-CML	4.74912	19.0813	1.2737	4.749	17.64	4	PRESENT	SOCIAL	ABSENT	6
SW-27-SE	7.24754	14.5667	0.5824	9.375	14.524	2	PRESENT	SOCIAL	ABSENT	6
SW-27-SE	7.20359	14.6916	0.586	9.383	14.461	2	PRESENT	SOCIAL	ABSENT	6
SW-27-SE	7.03887	19.9513	0.5481	11.28	19.633	1	PRESENT	SOCIAL	ABSENT	6
SW-27-SE	6.36042	17.3852	0.6013	9.413	17.3	1	PRESENT	SOCIAL	ABSENT	6
SW-29-SE	8.9461	12.9108	0.69	9.02	12.948	0	PRESENT	SOCIAL	ABSENT	6
SW-29-SE	4.4017	6.0786	0.454	4.402	6.079	0	PRESENT	SOCIAL	ABSENT	6
SW-29-SE	2.263	4.203	0.438	2.254	4.203	0	PRESENT	SOCIAL	ABSENT	6
SW-29-SE	1.6368	4.3934	0.498	1.551	4.393	0	PRESENT	SOCIAL	ABSENT	6
SW-30-SE	2.7423	12.3442	0.341	8.565	2.832	1	ABSENT	SOCIAL	ABSENT	6
SW-30-SE	2.3697	13.028	0.319	8.084	2.801	3	ABSENT	SOCIAL	ABSENT	6
SW-30-SE	2.3817	12.9989	0.317	8.286	2.656	1	ABSENT	SOCIAL	ABSENT	6
SW-30-SE	2.8176	13.0605	0.33	9.651	2.85	1	ABSENT	SOCIAL	ABSENT	6
SW-30-SE	3.9847	14.806	0.369	8.271	4.013	1	ABSENT	SOCIAL	ABSENT	6
SW-30-SE	2.6777	11.8258	0.347	7.622	2.738	1	ABSENT	SOCIAL	ABSENT	6
SW-30-SE	3.3122	12.1132	0.436	7.326	3.302	2	ABSENT	SOCIAL	ABSENT	6
SW-32-SE	11.9541	13.6772	0.604	12.058	13.423	0	ABSENT	SOCIAL	ABSENT	6
SW-32-SE	10.7474	12.2792	0.572	10.776	12.109	2	ABSENT	SOCIAL	ABSENT	6
SW-32-SE	11.3844	12.9016	0.979	11.682	12.67	0	ABSENT	SOCIAL	ABSENT	6
SW-32-SE	11.1988	12.1183	0.882	11.783	12.105	0	ABSENT	SOCIAL	ABSENT	6
SW-32-SE	10.0925	11.4718	0.85	10.206	11.447	2	ABSENT	SOCIAL	ABSENT	6
SW-32-SE	10.7437	13.36	1.265	10.736	13.14	1	ABSENT	SOCIAL	ABSENT	6
SW-32-SE	10.4783	12.0134	0.93	10.584	11.044	1	ABSENT	SOCIAL	ABSENT	6
SW-37-CML	6.1277	18.5339	1.374	6.775	6.271	3	ABSENT	SOCIAL	ABSENT	6
SW-37-CML	6.2421	18.2987	1.12	6.278	16.698	2	ABSENT	SOCIAL	ABSENT	6
SW-37-CML	6.0572	17.9233	1.423	6.108	6.159	3	ABSENT	SOCIAL	ABSENT	6
SW-37-CML	6.2197	17.1347	2.686	7.083	7.562	6	ABSENT	SOCIAL	ABSENT	6
SW-37-CML	5.4768	17.7062	1.809	6.36	5.64	4	ABSENT	SOCIAL	ABSENT	6
SW-37-CML	6.4242	19.4361	0.675	6.473	9.164	2	ABSENT	SOCIAL	ABSENT	6
SW-40-SE	7.8102	17.4369	0.387	7.677	17.31	0	ABSENT	SOCIAL	ABSENT	6
SW-40-SE	8.8093	17.469	1.057	9.226	17.585	2	ABSENT	SOCIAL	ABSENT	6
SW-40-SE	10.3743	17.711	0.321	11.419	17.726	1	ABSENT	SOCIAL	ABSENT	6
SW-41-CML	7.7013	14.1043	0.966	12.331	12.268	3	ABSENT	SOCIAL	ABSENT	6
SW-41-CML	7.5676	14.3597	1.076	12.134	13.976	2	ABSENT	SOCIAL	ABSENT	6
SW-41-CML	7.9631	13.8032	0.995	12.285	13.529	2	ABSENT	SOCIAL	ABSENT	6
SW-41-CML	7.4876	14.3518	0.998	10.648	14.105	2	ABSENT	SOCIAL	ABSENT	6
SW-41-CML	6.033	14.7799	1.054	7.339	6.104	3	ABSENT	SOCIAL	ABSENT	6
SW-41-CML	6.5254	14.0492	1.398	6.775	7.485	3	ABSENT	SOCIAL	ABSENT	6
SW-44-CML	6.2277	14.713	0.846	10.012	6.12	1	ABSENT	SOCIAL	ABSENT	6
SW-44-CML	6.1201	14.3718	0.61	8.845	5.964	1	ABSENT	SOCIAL	ABSENT	6
SW-44-CML	9.0667	15.1387	0.748	8.893	9.048	1	ABSENT	SOCIAL	ABSENT	6
SW-46-SE	6.364	10.1276	1.543	6.621	9.906	2	ABSENT	SOCIAL	ABSENT	6
SW-46-SE	6.1587	9.6486	1.685	7.106	8.793	3	ABSENT	SOCIAL	ABSENT	6
SW-46-SE	6.3806	9.8161	1.645	6.47	8.648	3	ABSENT	SOCIAL	ABSENT	6
SW-46-SE	6.3253	9.9543	1.563	6.484	9.048	3	ABSENT	SOCIAL	ABSENT	6
SW-46-SE	6.1935	9.8226	1.558	6.118	8.683	2	ABSENT	SOCIAL	ABSENT	6
SW-46-SE	6.1667	9.9893	1.334	6.194	9.823	2	ABSENT	SOCIAL	ABSENT	6
SW-46-SE	6.2903	10.2097	1.294	6.117	9.697	2	ABSENT	SOCIAL	ABSENT	6
SW-47-CML	4.3065	14.7528	2.029	13.058	4.351	9	ABSENT	SOCIAL	ABSENT	6
SW-47-CML	3.9303	14.5415	1.837	7.023	4.067	9	ABSENT	SOCIAL	ABSENT	6
SW-47-CML	4.4376	13.9732	1.716	5.962	4.457	9	ABSENT	SOCIAL	ABSENT	6
SW-49-SE	6.7392	12.8	0.411	7.748	6.97	1	ABSENT	SOCIAL	ABSENT	6
SW-49-SE	7.068	12.3905	0.291	6.994	6.994	1	ABSENT	SOCIAL	ABSENT	6
SW-49-SE	5.9349	12.4946	0.441	5.831	5.831	1	ABSENT	SOCIAL	ABSENT	6
SW-50-CML	6.30216	21.5831	1.0701	6.388	20.826	3	PRESENT	SOCIAL	ABSENT	6
SW-50-CML	6.14947	18.8754	0.9542	6.32	18.363	2	PRESENT	SOCIAL	ABSENT	6
SW-50-CML	6.1771	22.37	1.597	6.263	20.953	5	PRESENT	SOCIAL	ABSENT	6
SW-50-CML	6.16013	24.1574	1.5944	6.274	24.039	4	PRESENT	SOCIAL	ABSENT	6
SW-50-CML	5.97895	21.9965	1.6138	6.923	21.491	4	PRESENT	SOCIAL	ABSENT	6
SW-50-CML	6.1097	22.8197	1.0369	6.445	22.863	3	PRESENT	SOCIAL	ABSENT	6
SW-50-CML	6.20655	22.6116	1.0412	6.357	22.533	2	PRESENT	SOCIAL	ABSENT	6
SW-50-CML	5.8627	20.1218	1.6138	5.948	19.177	4	PRESENT	SOCIAL	ABSENT	6
SW-50-CML	6.44646	22.5595	1.6037	7.379	22.475	4	PRESENT	SOCIAL	ABSENT	6
SW-50-CML	6.36042	21.7102	1.6908	7.802	21.625	4	PRESENT	SOCIAL	ABSENT	6
SW-50-CML	6.16623	22.6185	1.058	6.776	22.416	2	PRESENT	SOCIAL	ABSENT	6
SW-50-CML	6.10601	22.637	1.5937	6.217	22.415	4	PRESENT	SOCIAL	ABSENT	6
SW-50-CML	6.0212	19.9564	1.0062	7.066	16.479	2	PRESENT	SOCIAL	ABSENT	6
SW-50-CML	6.61484	21.0318	0.9967	7.039	20.777	2	PRESENT	SOCIAL	ABSENT	6
SW-50-CML	6.41204	24.306	1.6312	6.803	22.916	4	PRESENT	SOCIAL	ABSENT	6
SW-50-CML	6.23383	22.9405	1.0345	6.276	22.813	2	PRESENT	SOCIAL	ABSENT	6
SW-50-CML	6.0212	20.6926	0.9341	6.36	17.979	2	PRESENT	SOCIAL	ABSENT	6
SW-50-CML	6.71751	26.5165	1.5151	6.835	23.19	5	PRESENT	SOCIAL	ABSENT	6
SW-50-CML	6.8889	22.8889	1.4299	6.889	19.436	4	PRESENT	SOCIAL	ABSENT	6
SW-50-CML	6.72198	22.1554	1.4999	6.787	22.096	4	PRESENT	SOCIAL	ABSENT	6
SW-50-CML	6.40211	20.8668	0.981	6.34	17.495	2	PRESENT	SOCIAL	ABSENT	6
SW-50-CML	6.32746	22.6418	1.5568	6.643	22.55	4	PRESENT	SOCIAL	ABSENT	6
SW-50-CML	6.09169	22.3194	1.0889	6.428	7.395	3	PRESENT	SOCIAL	ABSENT	6
SW-52-CML	6.80524	19.3684	1.1782	12.505	19.055	3	PRESENT	SOCIAL	ABSENT	6
SW-52-CML	5.0453	18.0408	1.5063	5.122	17.735	3	PRESENT	SOCIAL	ABSENT	6
SW-52-CML	6.46498	22.117	2.2146	11.144	19.905	5	PRESENT	SOCIAL	ABSENT	6
SW-52-CML	5.27463	21.2514	2.2707	5.198	19.035	5	PRESENT	SOCIAL	ABSENT	6
SW-54-SE	6.13534	14.4962	0.7725	6.164	14.316	2	PRESENT	SOCIAL	ABSENT	6
SW-54-SE	6.03965	14.015	0.5593	6.097	13.594	2	PRESENT	SOCIAL	ABSENT	6
SW-54-SE	5.65685	14.2556	0.811	5.72	14.171	2	PRESENT	SOCIAL	ABSENT	6
SW-54-SE	5.71971	13.7744	0.7511	5.783	13.896	2	PRESENT	SOCIAL	ABSENT	6
SW-54-SE	6.34825	13.5254	0.6133	6.411	13.835	2	PRESENT	SOCIAL	ABSENT	6
SW-54-SE	6.78823	13.1208	0.5574	6.788	13.042	0	PRESENT	SOCIAL	ABSENT	6
SW-54-SE	5.65685	19.1705	1.0702	5.783	19.248	0	PRESENT	SOCIAL	ABSENT	6
SW-54-SE	6.16578	15.218	0.8022	6.224	15.158	1	PRESENT	SOCIAL	ABSENT	6
SW-54-SE	6.47751	20.2704	1.1195	6.478	20.09	2	PRESENT	SOCIAL	ABSENT	6
SW-54-SE	5.75472	19.0133	0.9588	5.755	18.935	2	PRESENT	SOCIAL	ABSENT	6
SW-54-SE	5.77065	16.4992	0.9518	5.829	16.185	2	PRESENT	SOCIAL	ABSENT	6
SW-54-SE	5.77897	17.1667	0.8815	5.896	17.222	2	PRESENT	SOCIAL	ABSENT	6
SW-54-SE	5.69343	14.0556	0.704	5.956	14.028	2	PRESENT	SOCIAL	ABSENT	6
SW-54-SE	5.89256	20.1667	1.0952	6.05	20.114	2	PRESENT	SOCIAL	ABSENT	6
SW-54-SE	5.93085	18.3889	1.0399	5.991	18.375	1	PRESENT	SOCIAL	ABSENT	6
SW-54-SE	6.36559	17.3333	0.8715	6.452	17.29	2	PRESENT	SOCIAL	ABSENT	6
SW-54-SE	6.92958	19.4062	0.9636	6.93	18.699	3	PRESENT	SOCIAL	ABSENT	6
SW-54-SE	6.6064	18.4496	1.0888	6.667	18.138	2	PRESENT	SOCIAL	ABSENT	6
SW-54-SE	6.76449	14.1488	0.575	6.824	13.91	2	PRESENT	SOCIAL	ABSENT	6
SW-54-SE	6.35899	12.9797	0.5817	6.518	12.893	2	PRESENT	SOCIAL	ABSENT	6
SW-54-SE	6.11355	18.759	1.0426	6.175	18.718	2	PRESENT	SOCIAL	ABSENT	6
SW-54-SE	6.33287	13.2646	0.6748	6.333	13.394	2	PRESENT	SOCIAL	ABSENT	6
SW-54-SE	6.28979	12.815	0.7718	6.705	12.59	2	PRESENT	SOCIAL	ABSENT	6
SW-56-CML	7.10314	16.6232	2.4418	7.103	9.363	10	ABSENT	SOCIAL	ABSENT	6
SW-56-CML	7.22961	16.6662	0.9235	14.84	9.589	3	ABSENT	SOCIAL	ABSENT	6
SW-56-CML	7.53402	19.1014	2.7662	16.061	11.111	11	ABSENT	SOCIAL	ABSENT	6
SW-57-SE	5.31922	7.10719	0.4018	5.174	6.596	0	PRESENT	SOCIAL	ABSENT	6
SW-57-SE	5.32445	6.38881	0.4072	5.384	5.916	0	PRESENT	SOCIAL	ABSENT	6
SW-57-SE	5.81309	7.46725	0.4972	5.813	7.345	0	PRESENT	SOCIAL	ABSENT	6
SW-57-SE	6.08174	6.86648	0.4089	6.278	6.474	0	PRESENT	SOCIAL	ABSENT	6
SW-57-SE	5.297	6.80109	0.3483	5.493	6.54	0	PRESENT	SOCIAL	ABSENT	6
SW-57-SE	5.23161	6.80109	0.5344	5.232	6.409	0	PRESENT	SOCIAL	ABSENT	6
SW-57-SE	3.72752	6.14714	0.5308	4.12	4.016	0	PRESENT	SOCIAL	ABSENT	6
SW-58-CML	6.8664	16.1379	1.287	6.866	15.654	3	PRESENT	SOCIAL	ABSENT	6
SW-58-CML	7.2249	17.208	1.529	7.916	15.022	2	PRESENT	SOCIAL	ABSENT	6
SW-58-CML	6.6305	16.8909	1.965	8.823	15.399	4	PRESENT	SOCIAL	ABSENT	6
SW-60-SE	5.84128	14.8924	0.8746	6.236	9.17	4	PRESENT	SOCIAL	ABSENT	6
SW-60-SE	5.92887	13.5493	0.9911	6.536	9.003	3	PRESENT	SOCIAL	ABSENT	6
SW-60-SE	5.63617	13.3028	0.8904	5.836	7.87	3	PRESENT	SOCIAL	ABSENT	6
SW-60-SE	6.61814	12.2986	0.547	6.929	12.096	2	PRESENT	SOCIAL	ABSENT	6
SW-60-SE	5.72247	14.0625	0.7151	6.163	13.996	2	PRESENT	SOCIAL	ABSENT	6
SW-60-SE	5.4653	13.0932	0.9911	6.489	7.024	2	PRESENT	SOCIAL	ABSENT	6
SW-60-SE	5.93163	17.0769	0.6708	6.412	16.949	2	PRESENT	SOCIAL	ABSENT	6
SW-3-CML	5.27485	25.5934	2.0367	5.629	11.293	10	PRESENT	TRAVEL	ABSENT	6
SW-3-CML	4.72632	21.2219	1.8171	5.647	15.275	8	PRESENT	TRAVEL	ABSENT	6
SW-5-SE	7.0913	14.8002	1.155	7.084	8.598	2	ABSENT	TRAVEL	ABSENT	6
SW-5-SE	6.4145	10.6582	0.648	7.08	7.255	1	ABSENT	TRAVEL	ABSENT	6
SW-6-SE	5.3276	14.0559	1	5.328	14.038	0	PRESENT	TRAVEL	ABSENT	6
SW-6-SE	5.2155	15.2514	1.099	5.153	15.172	2	PRESENT	TRAVEL	ABSENT	6
SW-6-SE	5.3702	15.712	1.029	5.328	15.74	0	PRESENT	TRAVEL	ABSENT	6
SW-9-SE	5.1859	15.5578	1.157	5.186	15.437	0	PRESENT	TRAVEL	ABSENT	6
SW-9-SE	3.6181	15.9196	1.134	3.571	15.714	0	PRESENT	TRAVEL	ABSENT	6
SW-9-SE	3.2563	9.5276	0.619	3.08	9.345	0	PRESENT	TRAVEL	ABSENT	6
SW-12-SE	3.7143	10.1429	0.49	3.571	10.143	0	ABSENT	TRAVEL	ABSENT	6
SW-12-SE	4	13.7143	0.803	3.857	13.571	0	ABSENT	TRAVEL	ABSENT	6
SW-12-SE	5.4286	14.1429	0.627	5.416	14.124	0	ABSENT	TRAVEL	ABSENT	6
SW-16-SE	4.8525	15.4754	0.571	4.852	15.475	0	PRESENT	TRAVEL	ABSENT	6
SW-16-SE	5.1148	16.5246	0.554	4.984	10.623	1	PRESENT	TRAVEL	ABSENT	6
SW-16-SE	2.4686	15.36	0.654	2.377	9.051	1	PRESENT	TRAVEL	ABSENT	6
SW-16-SE	3.7486	16.64	0.594	3.749	13.531	1	PRESENT	TRAVEL	ABSENT	6
SW-16-SE	7.3366	14.374	0.747	7.337	7.263	1	PRESENT	TRAVEL	ABSENT	6
SW-18-CML	7.2407	15.8827	1.62	10.5	13.611	4	PRESENT	TRAVEL	ABSENT	6
SW-18-CML	6.6823	15.7917	0.907	10.583	15.719	2	PRESENT	TRAVEL	ABSENT	6
SW-18-CML	6.82	16.2652	1.498	11.839	13.333	4	PRESENT	TRAVEL	ABSENT	6
SW-25-CML	4.1466	22.2059	0.17	4.126	22.114	0	PRESENT	TRAVEL	ABSENT	6
SW-25-CML	3.8462	24.2526	0.741	3.738	22.473	2	PRESENT	TRAVEL	ABSENT	6
SW-25-CML	1.3426	24.7391	0.718	1.987	24.645	2	PRESENT	TRAVEL	ABSENT	6
SW-26-CML	4.8184	15.6595	0.932	8.988	4.811	2	ABSENT	TRAVEL	ABSENT	6
SW-26-CML	3.6848	17.0582	1.522	10.816	3.75	4	ABSENT	TRAVEL	ABSENT	6
SW-26-CML	5.4201	20.1821	1.258	7.308	6.065	4	ABSENT	TRAVEL	ABSENT	6
SW-43-SE	5.6159	15.3826	0.7023	5.749	14.149	2	PRESENT	TRAVEL	ABSENT	6
SW-43-SE	7.24094	16.5743	0.4658	7.341	16.541	1	PRESENT	TRAVEL	ABSENT	6
SW-43-SE	6.30761	14.7743	0.5214	6.408	14.708	1	PRESENT	TRAVEL	ABSENT	6
SW-50-CML	6.70862	23.3458	1.0878	6.709	22.992	3	PRESENT	TRAVEL	ABSENT	6
SW-50-CML	6.42544	24.8325	1.0707	6.496	24.62	3	PRESENT	TRAVEL	ABSENT	6
SW-50-CML	6.21305	22.5954	2.3056	6.071	8.762	6	PRESENT	TRAVEL	ABSENT	6
SW-59-CML	5.80442	12.9862	0.5996	7.723	5.854	2	PRESENT	TRAVEL	ABSENT	6
SW-59-CML	6.83742	14.6586	1.1688	8.411	7.133	3	PRESENT	TRAVEL	ABSENT	6
SW-59-CML	6.12174	14.7478	1.2547	6.985	6.296	2	PRESENT	TRAVEL	ABSENT	6
SW-59-CML	5.95349	12.4651	0.6748	7.38	6.264	2	PRESENT	TRAVEL	ABSENT	6
SW-59-CML	6.57364	12.7752	0.6347	7.752	6.822	2	PRESENT	TRAVEL	ABSENT	6
SW-9-SE	8.0358	13.1138	0.627	8.036	13.009	0	ABSENT	SOCIAL	ABSENT	8
SW-9-SE	9.1029	14.9954	0.646	9.159	14.884	0	ABSENT	SOCIAL	ABSENT	8
SW-6-SE	5.899	15.9192	0.823	5.899	15.905	0	ABSENT	FEEDING	ABSENT	8
SW-6-SE	5.9524	12.8571	0.804	6	12.81	0	ABSENT	FEEDING	ABSENT	8
SW-6-SE	4.9048	11.1429	0.855	4.909	11.143	0	ABSENT	FEEDING	ABSENT	8
SW-12-SE	9.6131	13.1494	0.578	9.546	13.048	0	PRESENT	FEEDING	ABSENT	8
SW-12-SE	9.239	15.9391	0.727	9.07	15.939	0	PRESENT	FEEDING	ABSENT	8
SW-12-SE	9.6918	13.0859	0.439	9.67	12.995	0	PRESENT	FEEDING	ABSENT	8
SW-23-SE	3.8967	8.1476	0.504	3.985	7.822	0	PRESENT	FEEDING	ABSENT	8
SW-29-SE	3.5424	7.0849	0.406	3.631	5.756	0	PRESENT	FEEDING	ABSENT	8
SW-29-SE	3.2563	6.8884	0.509	3.256	6.325	0	PRESENT	FEEDING	ABSENT	8
SW-33-SE	9.8153	18.0418	0.932	9.75	9.783	1	PRESENT	FEEDING	ABSENT	8
SW-33-SE	9.2467	19.1652	0.833	9.147	10.354	1	PRESENT	FEEDING	ABSENT	8
SW-33-SE	9.2419	17.3817	0.7	9.568	10.051	1	PRESENT	FEEDING	ABSENT	8
SW-5-SE	3.1188	11.8379	1.554	9.843	3.115	1	PRESENT	SOCIAL	ABSENT	8
SW-7-SE	6.768	10.7682	0.162	10.76	10.041	1	ABSENT	SOCIAL	ABSENT	8
SW-10-SE	4.2569	8.6606	0.506	4.55	8.661	0	PRESENT	SOCIAL	ABSENT	8
SW-10-SE	4.2569	8.6606	0.498	4.251	8.605	0	PRESENT	SOCIAL	ABSENT	8
SW-10-SE	4.6972	10.8624	0.37	4.717	10.108	0	PRESENT	SOCIAL	ABSENT	8
SW-10-SE	5.1376	10.7156	0.596	5.132	10.678	0	PRESENT	SOCIAL	ABSENT	8
SW-10-SE	5.1376	9.6881	0.597	5.132	9.59	0	PRESENT	SOCIAL	ABSENT	8
SW-10-SE	6.0183	10.7156	0.43	6.013	10.678	0	PRESENT	SOCIAL	ABSENT	8
SW-10-SE	5.498	10.263	0.535	5.498	10.263	0	PRESENT	SOCIAL	ABSENT	8
SW-10-SE	4.1101	9.9817	0.383	4.032	9.896	0	PRESENT	SOCIAL	ABSENT	8
SW-10-SE	4.2569	11.0694	0.575	4.325	11.143	0	PRESENT	SOCIAL	ABSENT	8
SW-10-SE	3.6697	9.9817	0.606	3.739	9.97	0	PRESENT	SOCIAL	ABSENT	8
SW-10-SE	3.8165	9.6032	0.533	3.812	9.603	0	PRESENT	SOCIAL	ABSENT	8
SW-13-CML	5.3243	14.5244	1.597	8.412	7.277	4	ABSENT	SOCIAL	ABSENT	8
SW-13-CML	5.1993	13.8649	1.282	9.037	6.334	3	ABSENT	SOCIAL	ABSENT	8
SW-14-SE	6.9257	12.0878	0.74	9.074	11.966	1	ABSENT	SOCIAL	ABSENT	8
SW-14-SE	7.2133	10.7106	0.63	8.752	10.703	1	ABSENT	SOCIAL	ABSENT	8
SW-14-SE	6.9793	11.2075	0.553	9.163	11.227	1	ABSENT	SOCIAL	ABSENT	8
SW-14-SE	6.8682	11.5034	0.65	9.233	11.449	1	ABSENT	SOCIAL	ABSENT	8
SW-14-SE	7.0777	10.3209	0.488	9.456	10.267	1	ABSENT	SOCIAL	ABSENT	8
SW-14-SE	7.1824	11.8311	0.646	8.566	11.821	1	ABSENT	SOCIAL	ABSENT	8
SW-14-SE	6.8716	9.1389	0.459	8.413	9.139	1	ABSENT	SOCIAL	ABSENT	8
SW-14-SE	7.1812	11.4504	0.71	8.825	11.422	1	ABSENT	SOCIAL	ABSENT	8
SW-14-SE	6.9481	11.5541	0.568	9.225	11.57	1	ABSENT	SOCIAL	ABSENT	8
SW-14-SE	7.043	11.9003	0.783	8.745	11.86	1	ABSENT	SOCIAL	ABSENT	8
SW-14-SE	6.7341	12.1139	0.62	9.477	12.093	1	ABSENT	SOCIAL	ABSENT	8
SW-18-CML	9.48523	19.4887	1.8753	10.833	10.5	7	ABSENT	SOCIAL	ABSENT	8
SW-18-CML	8.2754	17.99	2.0786	9.475	17.87	6	ABSENT	SOCIAL	ABSENT	8
SW-18-CML	8.97294	17.5558	0.6815	9.051	13.03	3	ABSENT	SOCIAL	ABSENT	8
SW-18-CML	9.20702	17.9459	0.5015	9.411	10.455	1	ABSENT	SOCIAL	ABSENT	8
SW-18-CML	9.1138	18.3615	3.8074	12.459	11.622	11	ABSENT	SOCIAL	ABSENT	8
SW-22-SE	1.552	2.8219	0.64	1.529	2.78	0	ABSENT	SOCIAL	ABSENT	8
SW-22-SE	1.7872	2.8596	0.531	1.736	2.349	3	ABSENT	SOCIAL	ABSENT	8
SW-34-SE	7.0468	17.3617	1.632	7.047	17.311	2	ABSENT	SOCIAL	ABSENT	8
SW-34-SE	6.4681	17.8723	2.087	6.434	7.404	4	ABSENT	SOCIAL	ABSENT	8
SW-34-SE	6.2809	17.9234	1.327	6.281	10.06	1	ABSENT	SOCIAL	ABSENT	8
SW-34-SE	7.5064	14.7151	0.708	7.51	14.619	0	ABSENT	SOCIAL	ABSENT	8
SW-34-SE	6.716	14.0426	0.984	6.716	14.046	0	ABSENT	SOCIAL	ABSENT	8
SW-34-SE	7.4382	16.1762	0.962	7.366	16.176	0	ABSENT	SOCIAL	ABSENT	8
SW-34-SE	6.9327	15.8873	1.076	6.86	15.887	0	ABSENT	SOCIAL	ABSENT	8
SW-34-SE	6.4994	14.5152	1.081	6.499	14.443	0	ABSENT	SOCIAL	ABSENT	8
SW-34-SE	7.3659	13.9375	1.13	7.353	13.838	0	ABSENT	SOCIAL	ABSENT	8
SW-34-SE	6.2809	11.6936	0.729	6.281	11.643	0	ABSENT	SOCIAL	ABSENT	8
SW-34-SE	7.1489	14.5152	0.876	7.077	14.443	0	ABSENT	SOCIAL	ABSENT	8
SW-34-SE	6.434	15.9319	1.33	6.23	15.83	0	ABSENT	SOCIAL	ABSENT	8
SW-36-CML	9.7222	16.4259	0.822	15.732	12.028	2	ABSENT	SOCIAL	ABSENT	8
SW-36-CML	8.1852	19.9414	2.197	12.052	14.514	8	ABSENT	SOCIAL	ABSENT	8
SW-36-CML	10.5043	18.9565	1.489	11.487	12.357	5	ABSENT	SOCIAL	ABSENT	8
SW-36-CML	8.2456	16.7239	0.682	9.722	14.809	2	ABSENT	SOCIAL	ABSENT	8
SW-36-CML	8.8174	17.4761	3.012	12.926	15.232	9	ABSENT	SOCIAL	ABSENT	8
SW-36-CML	9.8217	16.2565	1.586	15.312	14.921	4	ABSENT	SOCIAL	ABSENT	8
SW-36-CML	9.7391	16.9403	1.311	15.152	13.825	4	ABSENT	SOCIAL	ABSENT	8
SW-40-SE	9.5061	16.149	0.432	10.142	14.042	2	ABSENT	SOCIAL	ABSENT	8
SW-40-SE	8.4611	16.6136	0.464	9.601	16.541	3	ABSENT	SOCIAL	ABSENT	8
SW-40-SE	8.9365	17.6528	0.525	9.88	17.626	1	ABSENT	SOCIAL	ABSENT	8
SW-43-SE	5.7391	17.0716	0.621	5.739	17.072	0	ABSENT	SOCIAL	ABSENT	8
SW-43-SE	4.7452	17.0435	0.692	4.545	16.85	0	ABSENT	SOCIAL	ABSENT	8
SW-43-SE	6.7637	17.0952	0.689	6.798	16.926	0	ABSENT	SOCIAL	ABSENT	8
SW-43-SE	4.9565	16.4348	0.686	4.957	16.461	1	ABSENT	SOCIAL	ABSENT	8
SW-43-SE	5.487	16.3827	0.585	5.487	16.383	0	ABSENT	SOCIAL	ABSENT	8
SW-43-SE	4.6731	16.7246	0.718	4.673	16.725	0	ABSENT	SOCIAL	ABSENT	8
SW-43-SE	5.6522	17.1304	0.58	5.652	17.13	0	ABSENT	SOCIAL	ABSENT	8
SW-43-SE	4.5217	16.5217	0.69	4.522	16.522	0	ABSENT	SOCIAL	ABSENT	8
SW-52-CML	6.42765	22.34	1.9504	6.349	20.616	4	PRESENT	SOCIAL	ABSENT	8
SW-52-CML	5.25186	23.4374	1.9799	5.644	18.734	4	PRESENT	SOCIAL	ABSENT	8
SW-7-SE	7.344	11.2352	0.175	10.647	11.199	1	ABSENT	TRAVEL	ABSENT	8
SW-7-SE	6.987	11.7994	0.178	10.955	11.772	1	ABSENT	TRAVEL	ABSENT	8
SW-9-SE	6.8787	16.4415	1.215	6.81	16.378	0	PRESENT	TRAVEL	ABSENT	8
SW-9-SE	6.4467	16.4703	1.269	6.346	16.321	0	PRESENT	TRAVEL	ABSENT	8
SW-12-SE	9.3392	13.2028	0.462	9.179	13.089	0	PRESENT	TRAVEL	ABSENT	8
SW-12-SE	9.8166	13.0065	0.453	9.736	12.904	0	PRESENT	TRAVEL	ABSENT	8
SW-12-SE	9.1149	12.6693	0.404	9.232	12.634	0	PRESENT	TRAVEL	ABSENT	8
SW-12-SE	9.3495	12.8296	0.542	9.325	12.688	0	PRESENT	TRAVEL	ABSENT	8
SW-12-SE	9.5408	13.6466	0.435	9.528	13.478	0	PRESENT	TRAVEL	ABSENT	8
SW-12-SE	9.0691	13.1475	0.502	9.069	12.885	0	PRESENT	TRAVEL	ABSENT	8
SW-12-SE	9.1797	13.4378	0.551	8.903	13.327	0	PRESENT	TRAVEL	ABSENT	8
SW-12-SE	8.7732	13.0354	0.419	8.761	12.867	0	PRESENT	TRAVEL	ABSENT	8
SW-12-SE	8.7217	13.023	0.481	8.763	12.947	0	PRESENT	TRAVEL	ABSENT	8
SW-12-SE	9.0553	13.6452	0.465	9.124	13.438	0	PRESENT	TRAVEL	ABSENT	8
SW-12-SE	7.2	13.9317	0.437	7.2	13.931	0	ABSENT	TRAVEL	ABSENT	8
SW-12-SE	6.7902	13.1707	0.468	6.79	13.17	0	ABSENT	TRAVEL	ABSENT	8
SW-12-SE	7	13.2878	0.409	6.941	13	0	ABSENT	TRAVEL	ABSENT	8
SW-12-SE	6.2941	11.4146	0.437	6.167	11.414	0	ABSENT	TRAVEL	ABSENT	8
SW-12-SE	6.2501	14	0.592	6.25	13.824	0	ABSENT	TRAVEL	ABSENT	8
SW-12-SE	5.6854	12.0222	0.514	5.64	11.956	0	ABSENT	TRAVEL	ABSENT	8
SW-12-SE	5.2852	13.0849	0.51	5.247	13.085	0	ABSENT	TRAVEL	ABSENT	8
SW-13-CML	5.2358	15.3953	1.731	9.78	15.351	3	ABSENT	TRAVEL	ABSENT	8
SW-13-CML	4.8688	17.1982	2.856	7.751	17.136	6	ABSENT	TRAVEL	ABSENT	8
SW-13-CML	5.0453	13.7264	1.576	12.645	7.014	4	ABSENT	TRAVEL	ABSENT	8
SW-15-CML	5.7931	12.4138	1.918	8.226	5.936	8	ABSENT	TRAVEL	ABSENT	8
SW-15-CML	5.59717	12.1272	1.913	10.94	7.802	8	ABSENT	TRAVEL	ABSENT	8
SW-15-CML	6.4764	11.5136	1.108	9.775	9.595	6	ABSENT	TRAVEL	ABSENT	8
SW-15-CML	5.33703	11.4536	1.41	11.094	6.656	6	ABSENT	TRAVEL	ABSENT	8
SW-16-SE	4.6884	16.186	0.648	4.577	6.363	1	PRESENT	TRAVEL	ABSENT	8
SW-16-SE	5.7965	13.9535	0.721	5.727	7.473	1	PRESENT	TRAVEL	ABSENT	8
SW-16-SE	5.6854	12.0222	0.514	5.64	11.956	0	ABSENT	TRAVEL	ABSENT	8
SW-16-SE	5.2852	13.0849	0.51	5.247	13.085	4	ABSENT	TRAVEL	ABSENT	8
SW-22-SE	1.7075	2.9119	0.722	2.912	2.067	0	PRESENT	TRAVEL	ABSENT	8
SW-22-SE	1.6126	3.4576	0.704	3.356	3.203	0	PRESENT	TRAVEL	ABSENT	8
SW-22-SE	1.5428	2.6695	0.66	2.492	2.186	0	PRESENT	TRAVEL	ABSENT	8
SW-23-SE	2.9225	8.679	0.354	2.86	8.655	0	PRESENT	TRAVEL	ABSENT	8
SW-23-SE	3.2768	7.7934	0.304	3.365	7.793	0	PRESENT	TRAVEL	ABSENT	8
SW-35-CML	7.7647	17.0927	1.381	8	8.529	3	ABSENT	TRAVEL	ABSENT	8
SW-35-CML	5.7366	18.2634	1.047	5.674	10.096	3	ABSENT	TRAVEL	ABSENT	8
SW-35-CML	6.7902	18.9659	1.12	6.658	8.078	3	ABSENT	TRAVEL	ABSENT	8
SW-35-CML	6.322	17.3268	1.073	7.024	6.205	3	ABSENT	TRAVEL	ABSENT	8
SW-35-CML	4.2941	15	0.378	7.294	4.471	2	ABSENT	TRAVEL	ABSENT	8
SW-35-CML	7.2585	15.8049	0.642	7.961	7.141	1	ABSENT	TRAVEL	ABSENT	8
SW-35-CML	5.2683	21.4244	1.152	5.151	7.259	3	ABSENT	TRAVEL	ABSENT	8
SW-35-CML	6.5561	14.4	0.597	6.439	7.727	2	ABSENT	TRAVEL	ABSENT	8
SW-8-DML	4.773	22.9368	2.438	5.171	5.966	7	ABSENT	FEEDING	PRESENT	6
SW-8-DML	5.701	22.4064	2.566	5.642	5.642	7	ABSENT	FEEDING	PRESENT	6
SW-8-DML	6.1895	14.8375	1.111	9.282	6.119	1	ABSENT	FEEDING	PRESENT	6
SW-8-DML	7.2628	14.0911	1.027	7.223	7.866	1	ABSENT	FEEDING	PRESENT	6
SW-10-SE	2.5012	12.2326	0.878	2.501	12.233	0	PRESENT	FEEDING	PRESENT	6
SW-10-SE	3.2735	13.5248	0.979	3.187	13.525	0	PRESENT	FEEDING	PRESENT	6
SW-10-SE	3.0968	12.2326	1.038	3.015	12.146	0	PRESENT	FEEDING	PRESENT	6
SW-18-CML	8.6905	17.6552	1.625	8.64	10.914	4	PRESENT	FEEDING	ABSENT	6
SW-18-CML	8.6437	17.9874	1.256	9.297	17.987	2	PRESENT	FEEDING	ABSENT	6
SW-18-CML	8.4379	17.5326	1.679	8.893	10.661	6	PRESENT	FEEDING	ABSENT	6
SW-18-CML	9.1453	17.8391	1.215	9.297	11.773	4	PRESENT	FEEDING	ABSENT	6
SW-18-CML	9.1453	18.8968	1.263	9.448	16.067	7	PRESENT	FEEDING	ABSENT	6
SW-18-CML	8.8472	17.2874	1.649	9.916	15.224	5	PRESENT	FEEDING	ABSENT	6
SW-18-CML	9.5103	17.6552	1.11	10.188	10.228	5	PRESENT	FEEDING	ABSENT	6
SW-24-SE	5.4908	17.6842	0.898	5.333	17.537	0	PRESENT	FEEDING	PRESENT	6
SW-24-SE	6.2529	19.1292	0.803	6.931	19.126	0	PRESENT	FEEDING	PRESENT	6
SW-24-SE	5.3333	14.9005	1.112	5.36	13.244	2	PRESENT	FEEDING	PRESENT	6
SW-26-CML	3.5368	15.9158	2.098	3.941	15.865	4	PRESENT	FEEDING	PRESENT	6
SW-26-CML	3.3103	17.7853	2.802	3.941	6.973	7	PRESENT	FEEDING	PRESENT	6
SW-26-CML	3.8621	16.7242	2.008	3.891	4.749	5	PRESENT	FEEDING	PRESENT	6
SW-26-CML	4.5474	15.2325	2.111	5.608	14.602	4	PRESENT	FEEDING	PRESENT	6
SW-26-CML	3.9916	16.1179	2.761	4.598	4.295	7	PRESENT	FEEDING	PRESENT	6
SW-26-CML	4.6446	16	1.944	4.716	15.934	4	PRESENT	FEEDING	PRESENT	6
SW-26-CML	3.8621	16	1.873	5.363	11.624	4	PRESENT	FEEDING	PRESENT	6
SW-26-CML	3.3103	14.3776	1.448	4.176	14.298	2	PRESENT	FEEDING	PRESENT	6
SW-26-CML	4.5977	15.6482	1.444	5.582	7.62	3	PRESENT	FEEDING	PRESENT	6
SW-26-CML	3.8621	15.6322	1.191	4.216	13.148	2	PRESENT	FEEDING	PRESENT	6
SW-26-CML	4.2299	15.36	2.628	5.103	14.754	6	PRESENT	FEEDING	PRESENT	6
SW-26-CML	3.4358	15.5621	1.323	3.436	15.512	2	PRESENT	FEEDING	PRESENT	6
SW-26-CML	3.6782	16.1839	1.111	5.216	14.005	2	PRESENT	FEEDING	PRESENT	6
SW-27-SE	5.7234	14.5082	0.74	8.217	14.005	3	PRESENT	FEEDING	PRESENT	6
SW-27-SE	5.5529	14.1176	0.692	8.659	10.635	2	PRESENT	FEEDING	PRESENT	6
SW-27-SE	6.0235	14.4	0.756	9.6	14.4	1	PRESENT	FEEDING	PRESENT	6
SW-27-SE	5.1765	14.9647	0.777	9.035	10.055	2	PRESENT	FEEDING	PRESENT	6
SW-27-SE	5.6784	14.8633	0.866	8.64	7.427	2	PRESENT	FEEDING	PRESENT	6
SW-27-SE	5.5714	13.8087	0.673	7.445	13.681	4	PRESENT	FEEDING	PRESENT	6
SW-27-SE	5.1365	11.269	0.487	8.428	11.269	2	PRESENT	FEEDING	PRESENT	6
SW-27-SE	5.5321	10.4312	0.432	8.451	10.416	1	PRESENT	FEEDING	PRESENT	6
SW-27-SE	4.7816	14.524	0.79	8.644	12.733	2	PRESENT	FEEDING	PRESENT	6
SW-27-SE	5.3333	9.5632	0.488	8.317	9.061	2	PRESENT	FEEDING	PRESENT	6
SW-27-SE	5.8105	14.3495	0.788	8.842	13.743	2	PRESENT	FEEDING	PRESENT	6
SW-27-SE	5.5172	11.4023	0.643	8.369	11.383	1	PRESENT	FEEDING	PRESENT	6
SW-27-SE	5.3333	11.8672	0.607	8.828	11.77	1	PRESENT	FEEDING	PRESENT	6
SW-27-SE	5.8851	14.6526	0.646	8.644	14.552	1	PRESENT	FEEDING	PRESENT	6
SW-27-SE	5.3333	12.0253	0.543	8.286	11.924	1	PRESENT	FEEDING	PRESENT	6
SW-27-SE	5.8851	11.4189	0.658	8.488	11.419	1	PRESENT	FEEDING	PRESENT	6
SW-27-SE	5.7011	14.1474	0.795	8.276	11.034	2	PRESENT	FEEDING	PRESENT	6
SW-27-SE	5.6589	9.5632	0.501	8.589	9.563	1	PRESENT	FEEDING	PRESENT	6
SW-27-SE	5.8851	13.0575	0.575	8.691	12.935	1	PRESENT	FEEDING	PRESENT	6
SW-27-SE	5.4828	9.6	0.474	8.691	9.6	1	PRESENT	FEEDING	PRESENT	6
SW-27-SE	5.0927	10.5545	0.639	8.893	10.611	1	PRESENT	FEEDING	PRESENT	6
SW-27-SE	5.7011	12.5057	0.639	8.646	12.506	1	PRESENT	FEEDING	PRESENT	6
SW-27-SE	5.5172	12.9701	0.667	8.748	12.93	1	PRESENT	FEEDING	PRESENT	6
SW-43-SE	11.9059	18.879	0.421	11.9	18.786	0	ABSENT	FEEDING	PRESENT	6
SW-43-SE	10.6552	18.7959	0.467	10.648	18.722	0	ABSENT	FEEDING	PRESENT	6
SW-43-SE	11.2408	19.4274	0.454	11.213	19.336	0	ABSENT	FEEDING	PRESENT	6
SW-43-SE	11.1776	17.9384	0.439	11.124	17.894	0	ABSENT	FEEDING	PRESENT	6
SW-43-SE	9.9558	18.5167	0.471	9.96	18.479	0	ABSENT	FEEDING	PRESENT	6
SW-43-SE	10.3791	18.8842	0.565	10.305	18.605	0	ABSENT	FEEDING	PRESENT	6
SW-43-SE	9.5859	17.7209	0.557	9.57	17.565	0	ABSENT	FEEDING	PRESENT	6
SW-43-SE	7.0024	23.3855	0.844	6.948	18.249	1	ABSENT	FEEDING	PRESENT	6
SW-43-SE	5.5973	20.4229	0.705	5.585	18.114	1	ABSENT	FEEDING	PRESENT	6
SW-43-SE	5.6019	17.626	0.592	5.558	17.551	0	ABSENT	FEEDING	PRESENT	6
SW-43-SE	6.7644	18.4121	0.613	6.985	18.369	0	ABSENT	FEEDING	PRESENT	6
SW-43-SE	5.6545	18.4242	0.558	5.721	18.361	0	ABSENT	FEEDING	PRESENT	6
SW-43-SE	7.4757	18.5633	0.582	7.381	18.465	0	ABSENT	FEEDING	PRESENT	6
SW-43-SE	6.9385	18.8178	0.591	6.903	18.739	0	ABSENT	FEEDING	PRESENT	6
SW-43-SE	5.3939	23.0292	0.813	5.295	19.168	1	ABSENT	FEEDING	PRESENT	6
SW-43-SE	9.3203	21.8367	0.743	9.449	18.313	1	ABSENT	FEEDING	PRESENT	6
SW-1-SE	7.6114	14.1537	0.839	7.526	14.154	0	PRESENT	SOCIAL	PRESENT	6
SW-1-SE	7.9714	14.0141	1	8.097	13.815	0	PRESENT	SOCIAL	PRESENT	6
SW-1-SE	8.6978	14.1277	0.596	8.84	13.918	0	PRESENT	SOCIAL	PRESENT	6
SW-1-SE	8.453	12.0896	0.618	8.349	11.778	2	PRESENT	SOCIAL	PRESENT	6
SW-1-SE	8.5429	13.2924	0.549	8.664	13.242	0	PRESENT	SOCIAL	PRESENT	6
SW-1-SE	7.9258	14.1864	0.737	7.84	14.086	0	PRESENT	SOCIAL	PRESENT	6
SW-1-SE	7.8233	14.2886	0.669	7.82	14.113	0	PRESENT	SOCIAL	PRESENT	6
SW-1-SE	7.389	12.2069	0.41	7.379	12.018	0	PRESENT	SOCIAL	PRESENT	6
SW-9-SE	4.6669	25.0316	1.0275	4.78	24.858	0	PRESENT	SOCIAL	PRESENT	6
SW-9-SE	4.5414	28.0851	0.9375	4.78	27.885	0	PRESENT	SOCIAL	PRESENT	6
SW-9-SE	4.68106	31.1779	1.0085	4.807	31.052	0	PRESENT	SOCIAL	PRESENT	6
SW-9-SE	5.0855	22.9363	0.857	5.318	22.805	0	PRESENT	SOCIAL	PRESENT	6
SW-10-SE	6.31579	10.3799	0.4601	6.291	10.38	0	ABSENT	SOCIAL	PRESENT	6
SW-10-SE	3.88889	10	0.5035	3.888	9.965	0	ABSENT	SOCIAL	PRESENT	6
SW-10-SE	3.76682	12.6996	0.5751	4.09	12.269	0	ABSENT	SOCIAL	PRESENT	6
SW-10-SE	3.42455	10.502	0.9583	3.501	10.198	0	ABSENT	SOCIAL	PRESENT	6
SW-12-SE	6.31579	10.3799	0.4601	6.291	10.38	0	PRESENT	SOCIAL	PRESENT	6
SW-12-SE	3.88889	10	0.5035	3.888	9.965	0	PRESENT	SOCIAL	PRESENT	6
SW-12-SE	3.76682	12.6996	0.5751	4.09	12.269	0	PRESENT	SOCIAL	PRESENT	6
SW-12-SE	3.42455	10.502	0.9583	3.501	10.198	0	PRESENT	SOCIAL	PRESENT	6
SW-12-SE	7.14894	18.0426	0.8759	7.149	18.043	0	PRESENT	SOCIAL	PRESENT	6
SW-12-SE	6.25352	13.9437	0.6723	6.338	13.859	0	PRESENT	SOCIAL	PRESENT	6
SW-12-SE	7.07914	14.6763	0.6297	7.165	14.59	0	PRESENT	SOCIAL	PRESENT	6
SW-12-SE	8.20144	14.3309	0.7968	8.288	18.914	1	PRESENT	SOCIAL	PRESENT	6
SW-12-SE	6.51064	17.234	0.7767	6.607	17.101	0	PRESENT	SOCIAL	PRESENT	6
SW-12-SE	6.64328	15.4206	0.6395	6.662	15.459	0	PRESENT	SOCIAL	PRESENT	6
SW-12-SE	7.91579	19.6211	0.8671	8	19.443	0	PRESENT	SOCIAL	PRESENT	6
SW-12-SE	7.64913	15.9168	0.816	7.773	15.855	0	PRESENT	SOCIAL	PRESENT	6
SW-12-SE	6.19081	14.5462	1.0951	6.784	14.294	0	PRESENT	SOCIAL	PRESENT	6
SW-12-SE	7.71731	15.1899	0.8765	8.141	15.604	0	PRESENT	SOCIAL	PRESENT	6
SW-12-SE	6.14902	12.718	0.9644	6.149	12.365	0	PRESENT	SOCIAL	PRESENT	6
SW-12-SE	6.77828	13.7818	0.914	6.864	13.696	0	PRESENT	SOCIAL	PRESENT	6
SW-12-SE	6.59155	14.2763	0.6994	6.676	13.944	1	PRESENT	SOCIAL	PRESENT	6
SW-16-SE	6.4574	15.4978	0.642	6.673	15.283	0	PRESENT	SOCIAL	PRESENT	6
SW-16-SE	8.14283	14.7606	0.591	8.295	14.685	0	PRESENT	SOCIAL	PRESENT	6
SW-27-SE	7.3007	17.3706	0.9896	10.573	17.287	1	PRESENT	SOCIAL	PRESENT	6
SW-27-SE	7.04895	17.055	0.7627	9.231	16.851	1	PRESENT	SOCIAL	PRESENT	6
SW-27-SE	7.32228	16.1335	0.8807	10.517	16.05	1	PRESENT	SOCIAL	PRESENT	6
SW-27-SE	7.13287	18.1259	0.8705	10.741	18.042	1	PRESENT	SOCIAL	PRESENT	6
SW-27-SE	7.21678	18.3776	0.8203	11.245	18.21	1	PRESENT	SOCIAL	PRESENT	6
SW-34-SE	6.991	25.5369	0.633	6.991	25.31	0	ABSENT	SOCIAL	PRESENT	6
SW-34-SE	6.6389	22.5389	1.022	6.666	22.539	0	ABSENT	SOCIAL	PRESENT	6
SW-34-SE	6.9845	14.573	0.645	6.958	14.516	0	ABSENT	SOCIAL	PRESENT	6
SW-34-SE	8.1476	20.5966	0.666	8.091	20.527	0	ABSENT	SOCIAL	PRESENT	6
SW-43-SE	6.78027	17.1121	0.7356	6.673	16.574	0	ABSENT	SOCIAL	PRESENT	6
SW-43-SE	6.56502	17.2197	0.6579	6.673	17.22	0	ABSENT	SOCIAL	PRESENT	6
SW-43-SE	6.80851	17.2482	0.7103	6.809	17.021	0	ABSENT	SOCIAL	PRESENT	6
SW-43-SE	6.58156	17.7021	0.7149	6.695	17.362	0	ABSENT	SOCIAL	PRESENT	6
SW-43-SE	6.80851	17.0213	0.7097	6.582	15.773	1	ABSENT	SOCIAL	PRESENT	6
SW-43-SE	6.35461	17.4752	0.5971	6.468	17.135	0	ABSENT	SOCIAL	PRESENT	6
SW-43-SE	6.09817	17.1712	0.6268	6.499	16.93	0	ABSENT	SOCIAL	PRESENT	6
SW-43-SE	5.85745	17.3316	0.6165	5.857	17.011	0	ABSENT	SOCIAL	PRESENT	6
SW-43-SE	6.46809	17.9291	0.7408	6.355	17.248	1	ABSENT	SOCIAL	PRESENT	6
SW-43-SE	6.35461	17.7021	0.8029	6.355	17.475	0	ABSENT	SOCIAL	PRESENT	6
SW-43-SE	6.46809	15.4326	0.5604	6.355	15.092	0	ABSENT	SOCIAL	PRESENT	6
SW-43-SE	6.35461	14.8652	0.4212	6.468	14.525	0	ABSENT	SOCIAL	PRESENT	6
SW-43-SE	6.80851	17.2482	0.8132	6.809	16.794	0	ABSENT	SOCIAL	PRESENT	6
SW-43-SE	6.92199	19.2908	0.7509	7.262	19.404	0	ABSENT	SOCIAL	PRESENT	6
SW-43-SE	6.46809	19.2908	0.7511	6.582	19.291	0	ABSENT	SOCIAL	PRESENT	6
SW-43-SE	6.35461	18.2695	0.7615	6.695	17.929	0	ABSENT	SOCIAL	PRESENT	6
SW-43-SE	6.37838	17.5135	0.8383	6.388	17.094	0	ABSENT	SOCIAL	PRESENT	6
SW-51-CML	6.03965	11.648	1.5574	6.407	6.081	7	ABSENT	SOCIAL	PRESENT	6
SW-51-CML	6.12471	12.4765	1.1119	6.412	7.059	6	ABSENT	SOCIAL	PRESENT	6
SW-51-CML	6.46498	12.6748	1.2202	6.72	10.917	7	ABSENT	SOCIAL	PRESENT	6
SW-51-CML	6.8903	11.8371	1.1164	6.954	11.025	6	ABSENT	SOCIAL	PRESENT	6
SW-51-CML	6.84163	11.9422	0.978	8.667	7.333	5	ABSENT	SOCIAL	PRESENT	6
SW-51-CML	6.40592	11.9242	0.7483	6.756	6.581	1	ABSENT	SOCIAL	PRESENT	6
SW-51-CML	7.27007	11.8248	0.6579	7.533	7.883	1	ABSENT	SOCIAL	PRESENT	6
SW-55-SE	5.69302	19.7581	1.4006	9.265	19.312	2	ABSENT	SOCIAL	PRESENT	6
SW-55-SE	5.2885	19.4175	1.4017	8.367	19.496	2	ABSENT	SOCIAL	PRESENT	6
SW-55-SE	5.91628	19.1017	1.3802	8.651	18.944	2	ABSENT	SOCIAL	PRESENT	6
SW-55-SE	5.44637	19.2596	1.4752	8.762	19.102	2	ABSENT	SOCIAL	PRESENT	6
SW-55-SE	5.7621	19.5753	1.2902	7.42	18.391	2	ABSENT	SOCIAL	PRESENT	6
SW-55-SE	5.28146	21.3588	1.2552	5.825	21.203	2	ABSENT	SOCIAL	PRESENT	6
SW-55-SE	5.43679	21.4365	1.3861	5.592	21.126	2	ABSENT	SOCIAL	PRESENT	6
SW-55-SE	5.25	21.5357	1.4872	5.25	21.107	2	ABSENT	SOCIAL	PRESENT	6
SW-55-SE	6.42177	19.5918	1.3773	8.707	18.395	2	ABSENT	SOCIAL	PRESENT	6
SW-55-SE	5.65986	22.5306	1.3846	6.639	22.204	2	ABSENT	SOCIAL	PRESENT	6
SW-36-CML	6.1111	18.2933	2.242	7.544	13.763	7	PRESENT	SOCIAL	ABSENT	6
SW-36-CML	6.7156	19.5732	1.627	7.019	13.128	5	PRESENT	SOCIAL	ABSENT	6
SW-36-CML	5.2127	18.3529	1.622	5.959	12.531	5	PRESENT	SOCIAL	ABSENT	6
SW-36-CML	6.9346	17.2478	1.341	6.973	11.819	4	PRESENT	SOCIAL	ABSENT	6
SW-36-CML	6.1525	17.3072	1.153	6.229	8.415	3	PRESENT	SOCIAL	ABSENT	6
SW-36-CML	4.6507	17.177	1.087	5.91	4.848	3	PRESENT	SOCIAL	ABSENT	6
SW-36-CML	5.9492	17.7331	1.031	5.981	6.871	3	PRESENT	SOCIAL	ABSENT	6
SW-36-CML	7.6211	17.7687	0.944	7.881	11.644	5	PRESENT	SOCIAL	ABSENT	6
SW-36-CML	7.0647	17.461	2.197	6.899	17.411	6	PRESENT	SOCIAL	ABSENT	6
SW-36-CML	6.485	17.519	2.732	6.485	14.098	8	PRESENT	SOCIAL	ABSENT	6
SW-36-CML	6.1401	17.285	1.656	6.44	16.838	6	PRESENT	SOCIAL	ABSENT	6
SW-36-CML	6.2542	17.8569	2.021	6.33	13.547	6	PRESENT	SOCIAL	ABSENT	6
SW-36-CML	5.8889	17.4816	2.086	5.908	11.771	6	PRESENT	SOCIAL	ABSENT	6
SW-36-CML	5.3484	17.7724	1.283	5.42	6.017	3	PRESENT	SOCIAL	ABSENT	6
SW-36-CML	7.2801	18.014	1.25	8.216	13.66	4	PRESENT	SOCIAL	ABSENT	6
SW-36-CML	5.6105	17.4402	1.528	5.837	8.315	5	PRESENT	SOCIAL	ABSENT	6
SW-36-CML	6.5315	18.7818	3.652	6.585	15.381	10	PRESENT	SOCIAL	ABSENT	6
SW-36-CML	6.5409	16.4386	1.46	9.197	14.404	5	PRESENT	SOCIAL	ABSENT	6
SW-36-CML	6.5344	18.0363	3.212	7.218	12.225	10	PRESENT	SOCIAL	ABSENT	6
SW-36-CML	5.9186	17.9259	1.978	5.909	14.488	6	PRESENT	SOCIAL	ABSENT	6
SW-40-SE	8.8441	16.9454	0.354	9.343	16.677	0	PRESENT	SOCIAL	ABSENT	6
SW-40-SE	8.5369	18.5964	0.418	9.19	18.174	1	PRESENT	SOCIAL	ABSENT	6
SW-40-SE	8.8945	18.0445	0.409	9.619	18.025	1	PRESENT	SOCIAL	ABSENT	6
SW-40-SE	8.538	17.4898	0.423	8.668	17.433	1	PRESENT	SOCIAL	ABSENT	6
SW-40-SE	9.5057	19.0467	0.382	11.461	18.861	1	PRESENT	SOCIAL	ABSENT	6
SW-40-SE	8.8632	16.5795	0.345	9.906	16.499	1	PRESENT	SOCIAL	ABSENT	6
SW-40-SE	8.4854	15.2231	0.308	9.484	15.083	1	PRESENT	SOCIAL	ABSENT	6
SW-15-CML	6.28164	10.8409	1.8362	9.625	6.383	8	PRESENT	TRAVEL	PRESENT	6
SW-15-CML	5.42045	10.7902	1.4367	9.625	5.674	7	PRESENT	TRAVEL	PRESENT	6
SW-15-CML	5.01492	10.9929	1.2861	7.903	5.066	5	PRESENT	TRAVEL	PRESENT	6
SW-23-SE	3.23716	9.1229	0.4074	3.286	9.025	3	PRESENT	TRAVEL	PRESENT	6
SW-23-SE	3.04097	10.6924	0.2422	3.139	10.496	1	PRESENT	TRAVEL	PRESENT	6
SW-23-SE	4.16907	13.6844	0.3732	4.463	13.537	3	PRESENT	TRAVEL	PRESENT	6
SW-23-SE	4.07097	22.1987	0.4872	4.022	21.973	1	PRESENT	TRAVEL	PRESENT	6
SW-23-SE	3.92383	18.3439	0.4444	4.12	18.148	1	PRESENT	TRAVEL	PRESENT	6
SW-23-SE	4.6105	19.1287	0.3476	4.807	18.932	1	PRESENT	TRAVEL	PRESENT	6
SW-23-SE	4.26717	14.831	0.3305	4.384	14.733	1	PRESENT	TRAVEL	PRESENT	6
SW-23-SE	3.85755	12.9096	0.4774	3.927	12.84	1	PRESENT	TRAVEL	PRESENT	6
SW-24-SE	6.07721	14.1581	0.7575	7.569	14.123	2	PRESENT	TRAVEL	PRESENT	6
SW-24-SE	5.64632	19.3307	0.8471	6.873	19.036	2	PRESENT	TRAVEL	PRESENT	6
SW-24-SE	6.67632	16.9065	0.832	9.554	16.837	2	PRESENT	TRAVEL	PRESENT	6
SW-24-SE	6.00898	16.9957	0.7638	9.246	16.8	2	PRESENT	TRAVEL	PRESENT	6
SW-24-SE	6.15612	17.5703	0.6769	7.922	17.388	2	PRESENT	TRAVEL	PRESENT	6
SW-24-SE	6.5848	19.096	0.844	6.91	18.502	1	ABSENT	TRAVEL	PRESENT	6
SW-24-SE	6.4272	17.8284	0.86	9.317	17.907	1	ABSENT	TRAVEL	PRESENT	6
SW-24-SE	6.3282	19.9257	0.739	9.449	19.112	1	ABSENT	TRAVEL	PRESENT	6
SW-24-SE	6.07	21.4195	1.082	8.53	19.167	2	ABSENT	TRAVEL	PRESENT	6
SW-24-SE	6.4927	20.0287	0.831	8.18	19.674	1	ABSENT	TRAVEL	PRESENT	6
SW-24-SE	6.3158	21.4737	2.072	12.079	21.326	3	ABSENT	TRAVEL	PRESENT	6
SW-24-SE	6.3901	22.6625	1.434	6.474	22.426	2	ABSENT	TRAVEL	PRESENT	6
SW-1-SE	8.4779	13.6522	0.629	8.418	13.598	0	PRESENT	FEEDING	ABSENT	8
SW-1-SE	7.1104	13.4076	0.927	7.056	13.257	0	PRESENT	FEEDING	ABSENT	8
SW-1-SE	6.8889	13.7718	1.031	6.835	13.692	0	PRESENT	FEEDING	ABSENT	8
SW-1-SE	8.2403	13.8387	0.827	8.241	13.803	0	PRESENT	FEEDING	ABSENT	8
SW-1-SE	9.5287	12.7075	0.467	9.426	12.567	0	PRESENT	FEEDING	ABSENT	8
SW-1-SE	6.9129	15.3378	1.09	6.855	15.255	0	PRESENT	FEEDING	ABSENT	8
SW-1-SE	7.456	13.4513	0.928	7.412	13.339	0	PRESENT	FEEDING	ABSENT	8
SW-1-SE	7.3773	12.5731	0.859	7.168	12.456	0	PRESENT	FEEDING	ABSENT	8
SW-1-SE	7.5741	14.165	0.815	7.456	14.125	0	PRESENT	FEEDING	ABSENT	8
SW-1-SE	8.5329	14.2471	0.826	8.513	13.786	0	PRESENT	FEEDING	ABSENT	8
SW-1-SE	7.6395	14.5559	1.113	7.487	14.433	0	PRESENT	FEEDING	ABSENT	8
SW-1-SE	7.2166	13.9915	0.905	7.092	13.959	0	PRESENT	FEEDING	ABSENT	8
SW-1-SE	7.2974	14.7933	1.096	7.201	14.675	0	PRESENT	FEEDING	ABSENT	8
SW-1-SE	6.4369	16.6986	0.924	6.656	16.568	0	PRESENT	FEEDING	ABSENT	8
SW-1-SE	6.5871	14.6473	1.044	6.556	14.392	0	PRESENT	FEEDING	ABSENT	8
SW-1-SE	10.5523	13.4931	0.393	10.388	13.447	0	PRESENT	FEEDING	ABSENT	8
SW-1-SE	8.4264	11.406	0.393	8.405	11.352	0	PRESENT	FEEDING	ABSENT	8
SW-12-SE	9.6364	13.1847	0.4	9.636	13.056	0	ABSENT	FEEDING	PRESENT	8
SW-12-SE	9.9285	13.4446	0.368	9.896	13.187	0	ABSENT	FEEDING	PRESENT	8
SW-12-SE	9.3666	13.2727	0.418	9.496	13.109	0	ABSENT	FEEDING	PRESENT	8
SW-12-SE	9.5836	13.4545	0.501	9.648	13.132	0	ABSENT	FEEDING	PRESENT	8
SW-26-CML	6.1882	14.9869	2.772	7.302	11.603	6	ABSENT	FEEDING	PRESENT	8
SW-26-CML	5.2616	15.4884	2.541	7.767	11.88	7	ABSENT	FEEDING	PRESENT	8
SW-26-CML	5.8166	17.6697	3.359	7.022	12.686	11	ABSENT	FEEDING	PRESENT	8
SW-26-CML	5.7804	19.9127	1.973	7.261	11.924	5	ABSENT	FEEDING	PRESENT	8
SW-26-CML	6.0397	14.8246	1.393	6.508	10.77	5	ABSENT	FEEDING	PRESENT	8
SW-26-CML	5.9736	16.0705	1.289	6.534	12.495	4	ABSENT	FEEDING	PRESENT	8
SW-3-CML	6.3335	22.4921	1.663	12.911	22.492	5	ABSENT	SOCIAL	PRESENT	8
SW-18-CML	9.21218	17.3777	2.7397	10.245	12.36	3	ABSENT	SOCIAL	PRESENT	8
SW-18-CML	9.06461	17.3913	1.95	10.294	12.705	7	ABSENT	SOCIAL	PRESENT	8
SW-18-CML	9.6057	17.2793	3.4649	11.032	15.853	12	ABSENT	SOCIAL	PRESENT	8
SW-18-CML	9.45813	17.181	1.3588	10.442	15.951	5	ABSENT	SOCIAL	PRESENT	8
SW-18-CML	9.45813	16.9842	1.2853	14.771	13.098	5	ABSENT	SOCIAL	PRESENT	8
SW-18-CML	9.65489	16.8858	1.8493	9.655	10.442	7	ABSENT	SOCIAL	PRESENT	8
SW-18-CML	9.65489	19.0994	4.029	14.328	12.951	13	ABSENT	SOCIAL	PRESENT	8
SW-18-CML	8.76947	18.6075	2.0064	8.868	14.426	7	ABSENT	SOCIAL	PRESENT	8
SW-23-SE	2.17085	13.6281	0.4592	1.99	13.568	0	ABSENT	SOCIAL	PRESENT	8
SW-23-SE	1.68844	10.8543	0.5322	1.809	9.889	0	ABSENT	SOCIAL	PRESENT	8
SW-27-SE	7.59799	13.809	0.459	11.638	13.568	1	ABSENT	SOCIAL	PRESENT	8
SW-27-SE	7.61585	12.9032	0.3971	9.79	12.603	2	ABSENT	SOCIAL	PRESENT	8
SW-27-SE	7.11669	11.1834	0.3691	11.027	11.105	1	ABSENT	SOCIAL	PRESENT	8
SW-27-SE	7.19489	13.1385	0.5444	8.837	12.826	1	ABSENT	SOCIAL	PRESENT	8
SW-27-SE	7.03848	12.8257	0.4362	9.306	12.669	1	ABSENT	SOCIAL	PRESENT	8
SW-27-SE	7.23288	12.1096	0.4922	9.973	11.945	1	ABSENT	SOCIAL	PRESENT	8
SW-27-SE	7.41929	17.3534	0.8648	11.086	17.013	1	ABSENT	SOCIAL	PRESENT	8
SW-27-SE	7.02522	14.4122	0.5386	9.637	13.815	1	ABSENT	SOCIAL	PRESENT	8
SW-27-SE	7.36379	15.4355	0.6664	9.466	14.583	1	ABSENT	SOCIAL	PRESENT	8
SW-27-SE	7.36379	14.3269	0.6249	9.466	14.071	1	ABSENT	SOCIAL	PRESENT	8
SW-27-SE	7.44843	16.402	0.8484	10.372	16.161	1	ABSENT	SOCIAL	PRESENT	8
SW-27-SE	7.27914	17.9095	0.8252	9.95	17.729	2	ABSENT	SOCIAL	PRESENT	8
SW-27-SE	7.69925	16.2406	0.8029	8.251	15.907	2	ABSENT	SOCIAL	PRESENT	8
SW-27-SE	7.44843	15.6391	0.6424	9.624	15.278	2	ABSENT	SOCIAL	PRESENT	8
SW-27-SE	7.27914	17.6842	0.7139	9.023	17.444	2	ABSENT	SOCIAL	PRESENT	8
SW-27-SE	7.27914	16.3609	0.7962	8.301	15.639	2	ABSENT	SOCIAL	PRESENT	8
SW-27-SE	7.33835	15.2782	0.8278	7.579	14.797	2	ABSENT	SOCIAL	PRESENT	8
SW-27-SE	7.09678	16.2763	0.7345	10.182	15.891	1	ABSENT	SOCIAL	PRESENT	8
SW-27-SE	7.09678	16.8934	0.8128	10.491	16.508	1	ABSENT	SOCIAL	PRESENT	8
SW-33-SE	5.16831	13.4993	0.8762	5.323	13.268	0	ABSENT	SOCIAL	PRESENT	8
SW-33-SE	3.70267	12.9593	0.6861	3.626	12.728	0	ABSENT	SOCIAL	PRESENT	8
SW-33-SE	4.33834	12.5046	0.6908	4.679	12.42	0	ABSENT	SOCIAL	PRESENT	8
SW-33-SE	4.11643	12.66	0.7979	4.039	12.427	0	ABSENT	SOCIAL	PRESENT	8
SW-33-SE	3.57275	13.359	0.9843	3.806	13.126	0	ABSENT	SOCIAL	PRESENT	8
SW-33-SE	3.89931	12.7963	0.8911	4.064	12.577	0	ABSENT	SOCIAL	PRESENT	8
SW-33-SE	3.29519	12.5217	0.8576	3.515	12.357	0	ABSENT	SOCIAL	PRESENT	8
SW-33-SE	4.50343	12.6865	0.6512	4.613	12.302	0	ABSENT	SOCIAL	PRESENT	8
SW-40-SE	8.97902	17.203	0.4345	9.318	17.553	0	ABSENT	SOCIAL	PRESENT	8
SW-40-SE	8.99323	18.4698	0.4139	9.643	17.826	1	ABSENT	SOCIAL	PRESENT	8
SW-40-SE	8.09959	21.5218	1.0104	9.488	21.29	2	ABSENT	SOCIAL	PRESENT	8
SW-40-SE	8.7167	24.0673	0.3617	9.72	23.45	1	ABSENT	SOCIAL	PRESENT	8
SW-40-SE	8.78182	20.5091	0.4512	10.418	20.782	1	ABSENT	SOCIAL	PRESENT	8
SW-40-SE	8.34545	20.8275	0.4625	8.945	20.673	1	ABSENT	SOCIAL	PRESENT	8
SW-40-SE	9.65455	19.3636	0.4773	11.182	19.309	1	ABSENT	SOCIAL	PRESENT	8
SW-50-CML	5.9855	16.4022	1.295	7.816	6.69	3	ABSENT	SOCIAL	PRESENT	8
SW-50-CML	6.1038	18.1087	2.388	6.094	6.686	7	ABSENT	SOCIAL	PRESENT	8
SW-24-SE	6.5703	16.2433	0.736	7.027	16.243	0	ABSENT	SOCIAL	PRESENT	8
SW-24-SE	5.913	21.0435	0.955	7.538	20.952	1	ABSENT	SOCIAL	PRESENT	8
SW-24-SE	6.087	20.6957	0.825	8.174	20.696	0	ABSENT	SOCIAL	PRESENT	8
SW-24-SE	6.2609	18	0.842	7.826	17.913	1	ABSENT	SOCIAL	PRESENT	8
SW-24-SE	6.3478	21.5361	0.793	7.13	21.478	1	ABSENT	SOCIAL	PRESENT	8
SW-24-SE	6.5217	19.0435	0.802	7.391	19.043	1	ABSENT	SOCIAL	PRESENT	8
SW-24-SE	6.087	20.6087	0.88	6.873	20.522	1	ABSENT	SOCIAL	PRESENT	8
SW-24-SE	6.0873	14.0532	0.687	6.887	14.019	1	ABSENT	SOCIAL	PRESENT	8
SW-24-SE	6.8696	16.2433	0.673	6.957	16.261	0	ABSENT	SOCIAL	PRESENT	8
SW-24-SE	6.087	14.1739	0.678	7.652	14.174	1	ABSENT	SOCIAL	PRESENT	8
SW-24-SE	5.913	17.4042	0.699	8.435	17.515	1	ABSENT	SOCIAL	PRESENT	8
SW-24-SE	6	19.7321	0.639	8.536	19.732	1	ABSENT	SOCIAL	PRESENT	8
SW-3-CML	5.9397	20.3647	0.8688	13.885	7.174	2	ABSENT	TRAVEL	PRESENT	8
SW-3-CML	6.47967	21.8303	0.8423	6.557	16.364	2	ABSENT	TRAVEL	PRESENT	8
SW-3-CML	5.86256	21.2132	0.9333	12.218	10.473	5	ABSENT	TRAVEL	PRESENT	8
SW-3-CML	6.09398	22.8331	2.1369	12.419	10.568	8	ABSENT	TRAVEL	PRESENT	8
SW-10-SE	3.51398	7.00906	0.645	3.592	6.698	0	ABSENT	TRAVEL	PRESENT	8
SW-10-SE	3.04797	10.5818	0.8643	3.669	7.863	0	ABSENT	TRAVEL	PRESENT	8
SW-10-SE	3.74698	8.6401	0.7457	3.98	8.329	0	ABSENT	TRAVEL	PRESENT	8
SW-12-SE	9.8035	13.6422	0.483	9.771	13.435	0	ABSENT	TRAVEL	PRESENT	8
SW-12-SE	9.4067	12.7155	0.439	9.342	12.665	0	ABSENT	TRAVEL	PRESENT	8
SW-14-SE	5.5213	19.1466	1.246	7.481	11.488	3	PRESENT	TRAVEL	PRESENT	8
SW-14-SE	6.3228	19.0575	1.698	7.302	13.981	3	PRESENT	TRAVEL	PRESENT	8
SW-14-SE	7.82661	14.5683	0.9135	8.834	14.103	2	ABSENT	TRAVEL	PRESENT	8
SW-14-SE	6.9742	17.0481	0.8762	8.602	16.738	2	ABSENT	TRAVEL	PRESENT	8
SW-14-SE	7.17808	14.0274	0.7383	8.438	12.493	2	ABSENT	TRAVEL	PRESENT	8
SW-14-SE	7.28767	15.956	0.8013	7.562	13.049	2	ABSENT	TRAVEL	PRESENT	8
SW-14-SE	7.19438	16.3288	0.9732	8.384	16.219	2	ABSENT	TRAVEL	PRESENT	8
SW-14-SE	7.0137	16.4857	0.9377	7.836	16.503	2	ABSENT	TRAVEL	PRESENT	8
SW-14-SE	7.01964	16.0449	0.8837	8.022	15.582	2	ABSENT	TRAVEL	PRESENT	8
SW-14-SE	7.09678	16.122	0.4437	8.177	15.891	1	ABSENT	TRAVEL	PRESENT	8
SW-14-SE	6.81007	15.2128	0.8279	8.183	15.213	2	ABSENT	TRAVEL	PRESENT	8
SW-14-SE	7.08239	14.5774	0.9096	8.183	14.655	2	ABSENT	TRAVEL	PRESENT	8
SW-14-SE	7.04355	12.3638	0.3375	7.898	12.325	1	ABSENT	TRAVEL	PRESENT	8
SW-15-CML	5.2193	11.7694	1.79	7.402	9.633	6	PRESENT	TRAVEL	PRESENT	8
SW-18-CML	7.85454	17.742	1.3982	15.351	8.1	5	ABSENT	TRAVEL	PRESENT	8
SW-18-CML	9.02525	17.3563	1.3087	10.568	12.342	4	ABSENT	TRAVEL	PRESENT	8
SW-18-CML	8.09959	18.2048	2.5839	12.188	15.351	9	ABSENT	TRAVEL	PRESENT	8
SW-18-CML	7.63675	17.2791	3.2438	7.174	16.662	10	ABSENT	TRAVEL	PRESENT	8
SW-18-CML	6.63395	17.5105	2.5294	6.788	16.036	8	ABSENT	TRAVEL	PRESENT	8
SW-18-CML	9.44588	17.2791	1.1745	9.606	11.339	4	ABSENT	TRAVEL	PRESENT	8
SW-18-CML	8.94545	17.3455	1.6145	13.091	12.327	6	ABSENT	TRAVEL	PRESENT	8
SW-18-CML	8.48528	17.3563	2.9319	8.562	11.891	10	ABSENT	TRAVEL	PRESENT	8
SW-18-CML	7.30909	17.1273	1.3578	7.855	16.909	4	ABSENT	TRAVEL	PRESENT	8
SW-21-CML	3.7036	14.8665	0.925	4.633	14.498	2	ABSENT	TRAVEL	PRESENT	8
SW-21-CML	4.1739	14.6087	1.644	4.364	10.625	4	ABSENT	TRAVEL	PRESENT	8
SW-23-SE	3.10393	10.8387	0.5183	3.159	10.531	2	PRESENT	TRAVEL	PRESENT	8
SW-23-SE	4.47926	9.12442	0.4304	4.867	9.09	2	PRESENT	TRAVEL	PRESENT	8
SW-27-SE	7.14894	15.6596	0.8286	10.128	15.574	1	PRESENT	TRAVEL	PRESENT	8
SW-27-SE	7.27526	16.3066	0.6866	10.369	16.223	1	PRESENT	TRAVEL	PRESENT	8
SW-27-SE	7.19164	12.7944	0.5826	9.199	12.711	1	PRESENT	TRAVEL	PRESENT	8
SW-27-SE	7.41176	12.7944	0.539	9.366	12.711	1	PRESENT	TRAVEL	PRESENT	8
SW-27-SE	7.40426	19.0638	0.9659	9.617	18.899	1	PRESENT	TRAVEL	PRESENT	8
SW-27-SE	7.27526	17.0592	1.0078	9.617	16.976	1	PRESENT	TRAVEL	PRESENT	8
SW-27-SE	6.79412	18.8153	0.9843	10.453	18.732	1	PRESENT	TRAVEL	PRESENT	8
SW-27-SE	7.19363	16.3607	0.8504	9.129	16.188	1	PRESENT	TRAVEL	PRESENT	8
SW-27-SE	7.5	15.2558	0.8571	9.343	15.138	1	PRESENT	TRAVEL	PRESENT	8
SW-53-CML	6.31579	14.8284	1.2523	6.535	13.73	2	ABSENT	TRAVEL	PRESENT	8
SW-53-CML	5.87643	14.8284	1.1732	6.206	14.554	2	ABSENT	TRAVEL	PRESENT	8
SW-53-CML	5.43707	14.6284	0.8595	5.547	12.796	2	ABSENT	TRAVEL	PRESENT	8
SW-53-CML	6.28246	14.9037	1.7897	7.059	13.195	4	ABSENT	TRAVEL	PRESENT	8
SW-53-CML	6.53871	13.7619	1.1732	7.277	13.607	2	ABSENT	TRAVEL	PRESENT	8
SW-7-SE	13.9896	24.6287	0.083	18.039	24.441	1	ABSENT	FEEDING	PRESENT	6
SW-7-SE	9.8923	19.7364	0.165	19.641	16.621	1	ABSENT	FEEDING	PRESENT	6
SW-7-SE	13.8363	24.6405	0.149	21.656	24.389	1	ABSENT	FEEDING	PRESENT	6
SW-7-SE	10.6697	20.1109	0.093	17.294	19.853	1	ABSENT	FEEDING	PRESENT	6
SW-7-SE	11.2658	17.836	0.093	17.795	15.236	1	ABSENT	FEEDING	PRESENT	6
SW-7-SE	9.4438	17.8608	0.099	17.896	17.931	1	ABSENT	FEEDING	PRESENT	6
SW-7-SE	10.1822	18.58	0.109	18.466	15.394	1	ABSENT	FEEDING	PRESENT	6
SW-7-SE	12.5999	20.47	0.075	16.281	15.409	1	ABSENT	FEEDING	PRESENT	6
SW-18-CML	8.8938	18.5641	2.267	9.231	8.718	6	ABSENT	SOCIAL	ABSENT	6
SW-18-CML	8.6411	17.4052	2.13	8.782	17.369	4	ABSENT	SOCIAL	ABSENT	6
SW-18-CML	8.6938	17.1209	2.028	10.241	12.626	6	ABSENT	SOCIAL	ABSENT	6
SW-29-SE	1.9326	6.8157	0.501	1.892	4.345	2	ABSENT	SOCIAL	ABSENT	6
SW-29-SE	3.0981	7.3493	0.501	3.098	7.17	2	ABSENT	SOCIAL	ABSENT	6
SW-29-SE	3.0443	6.3537	0.536	3.044	5.95	2	ABSENT	SOCIAL	ABSENT	6
SW-29-SE	2.5029	7.792	0.463	2.465	7.754	4	ABSENT	SOCIAL	ABSENT	6
SW-29-SE	4.1875	6.3938	0.18	5.344	6.259	1	ABSENT	SOCIAL	ABSENT	6
SW-29-SE	3.2773	7.1517	0.499	3.277	6.883	1	ABSENT	SOCIAL	ABSENT	6
SW-29-SE	2.6945	7.3493	0.517	2.721	7.269	1	ABSENT	SOCIAL	ABSENT	6
SW-29-SE	3.7455	6.9354	0.478	3.754	6.577	0	ABSENT	SOCIAL	ABSENT	6
SW-29-SE	2.3144	7.3232	0.543	2.326	7.214	0	ABSENT	SOCIAL	ABSENT	6
SW-29-SE	3.7435	6.2674	0.391	3.852	6.159	0	ABSENT	SOCIAL	ABSENT	6
SW-7-SE	13.0224	24.6457	0.125	24.63	22.451	1	ABSENT	TRAVEL	PRESENT	6
SW-7-SE	17.2197	25.0762	0.073	24.934	21.665	1	ABSENT	TRAVEL	PRESENT	6
SW-7-SE	13.7758	24.3508	0.067	15.083	24.113	1	ABSENT	TRAVEL	PRESENT	6
SW-7-SE	12.4696	21.1429	0.102	16.984	20.905	1	ABSENT	TRAVEL	PRESENT	6
SW-27-SE	7.458	18.9021	0.805	9.556	18.817	1	PRESENT	TRAVEL	PRESENT	6
SW-27-SE	7.2382	14.8806	0.686	8.73	14.891	1	PRESENT	TRAVEL	PRESENT	6
SW-27-SE	7.3391	19.974	0.818	9.374	19.933	4	PRESENT	TRAVEL	PRESENT	6
SW-27-SE	6.7402	18.0582	0.825	9.465	17.97	5	PRESENT	TRAVEL	PRESENT	6
SW-27-SE	7.0796	11.4629	0.331	10	11.407	1	PRESENT	TRAVEL	PRESENT	6
SW-27-SE	7.2696	14.378	0.583	10.02	14.371	1	PRESENT	TRAVEL	PRESENT	6
SW-18-CML	4.457	18.1595	2.595	9.948	4.676	7	ABSENT	SOCIAL	ABSENT	6
SW-18-CML	5.2275	17.5308	1.861	9.109	5.182	5	ABSENT	SOCIAL	ABSENT	6
SW-18-CML	4.7966	18.2556	1.748	9.742	5.067	6	ABSENT	SOCIAL	ABSENT	6
SW-18-CML	5.1992	18.6318	1.982	10.283	5.195	5	ABSENT	SOCIAL	ABSENT	6
SW-18-CML	7.9057	17.4389	2.847	7.836	11.517	8	ABSENT	SOCIAL	ABSENT	6
SW-20-SE	4.9075	8.9762	0.741	4.885	8.951	0	ABSENT	SOCIAL	PRESENT	6
SW-20-SE	4.1157	9.3154	0.966	4.158	9.241	0	ABSENT	SOCIAL	PRESENT	6
SW-20-SE	4.3684	11.1496	0.97	4.443	11.125	0	ABSENT	SOCIAL	PRESENT	6
SW-20-SE	4.4628	10.3156	0.86	4.414	10.175	2	ABSENT	SOCIAL	PRESENT	6
SW-20-SE	2.359	9.3832	0.895	2.265	8.916	0	ABSENT	SOCIAL	PRESENT	6
SW-20-SE	4.2659	9.3337	0.995	4.29	9.307	0	ABSENT	SOCIAL	PRESENT	6
SW-20-SE	4.7983	9.9575	0.924	4.852	9.933	0	ABSENT	SOCIAL	PRESENT	6
SW-20-SE	4.4104	8.3557	0.772	4.434	8.092	1	ABSENT	SOCIAL	PRESENT	6
SW-8-DML	4.9655	35.8251	2.968	5.793	18.207	8	ABSENT	SOCIAL	PRESENT	6
SW-8-DML	4.4781	23.7901	2.705	10.552	17.586	8	ABSENT	SOCIAL	PRESENT	6
SW-2-CML	5.7983	17.6709	0.904	6.165	6.169	3	ABSENT	TRAVEL	PRESENT	6
SW-2-CML	5.7865	17.7832	1.357	6.689	6.783	5	ABSENT	TRAVEL	PRESENT	6
SW-2-CML	5.8965	17.5736	1.388	5.862	6.67	5	ABSENT	TRAVEL	PRESENT	6
SW-28-CML	5.7983	17.6709	0.904	6.165	6.169	3	ABSENT	TRAVEL	ABSENT	6
SW-28-CML	5.7865	17.7832	1.357	6.689	6.783	5	ABSENT	TRAVEL	ABSENT	6
SW-28-CML	5.8965	17.5736	1.388	5.862	6.67	5	ABSENT	TRAVEL	ABSENT	6
SW-57-SE	6.0159	6.9777	0.66	6.392	6.133	0	ABSENT	TRAVEL	PRESENT	6
SW-57-SE	5.9787	6.8948	0.593	6.552	5.969	0	ABSENT	TRAVEL	PRESENT	6
SW-3-CML	6.5053	20.4706	2.694	6.598	10.204	8	ABSENT	TRAVEL	PRESENT	6
SW-3-CML	6.5111	20.1685	1.001	9.171	8.392	3	ABSENT	TRAVEL	PRESENT	6
SW-5-SE	6.3903	13.0044	0.999	9.1	6.616	1	ABSENT	TRAVEL	PRESENT	8
SW-5-SE	5.8533	13.17	0.892	9.767	6.545	1	ABSENT	TRAVEL	PRESENT	8
SW-26-CML	3.5242	15.8683	1.586	6.107	11.461	4	PRESENT	TRAVEL	PRESENT	8
SW-26-CML	3.9199	15.6887	1.604	5.506	10.852	4	PRESENT	TRAVEL	PRESENT	8
SW-26-CML	3.8312	16.2559	1.669	4.472	11.279	4	PRESENT	TRAVEL	PRESENT	8
SW-26-CML	3.4925	17.6503	1.677	4.435	11.109	4	PRESENT	TRAVEL	PRESENT	8
SW-26-CML	3.1354	16.0372	1.77	3.09	12.408	4	PRESENT	TRAVEL	PRESENT	8
SW-55-SE	6.4445	22.699	1.084	6.445	22.627	1	ABSENT	TRAVEL	PRESENT	8
SW-18-CML	9.1618	18.5726	4.25	9.162	11.054	14	ABSENT	SOCIAL	ABSENT	8
SW-18-CML	9.2734	16.6277	0.775	10.213	11.266	4	ABSENT	SOCIAL	ABSENT	8
SW-18-CML	8.5205	18.9422	3.46	10.477	11.203	10	ABSENT	SOCIAL	ABSENT	8
SW-18-CML	4.4202	17.2309	1.453	7.844	4.371	3	ABSENT	SOCIAL	ABSENT	8
SW-18-CML	4.1045	17.8605	3.285	4.026	9.684	9	ABSENT	SOCIAL	ABSENT	8
SW-18-CML	8.166	16.9295	2.316	8.066	13.544	7	ABSENT	SOCIAL	ABSENT	8
SW-18-CML	5.4925	19.5056	4.183	8.309	6.971	12	ABSENT	SOCIAL	ABSENT	8
SW-18-CML	8.6613	19.4191	2.879	9.718	10.351	10	ABSENT	SOCIAL	ABSENT	8
SW-18-CML	8.8099	17.0367	1.738	8.864	10.917	6	ABSENT	SOCIAL	ABSENT	8
SW-18-CML	8.8133	19.4191	3.01	15.884	13.145	11	ABSENT	SOCIAL	ABSENT	8
SW-18-CML	9.2247	20.2098	2.231	10.211	15.633	6	ABSENT	SOCIAL	ABSENT	8
SW-18-CML	8.2011	17.041	0.972	8.873	8.168	3	ABSENT	SOCIAL	ABSENT	8
SW-18-CML	7.5907	20.1038	2.325	7.396	10.474	8	ABSENT	SOCIAL	ABSENT	8
SW-18-CML	9.439	17.0845	2.524	11.968	11.041	7	ABSENT	SOCIAL	ABSENT	8
SW-18-CML	8.362	17.2806	2.045	8.686	10.771	6	ABSENT	SOCIAL	ABSENT	8
SW-18-CML	9.2359	17.2146	1.997	9.192	16.188	6	ABSENT	SOCIAL	ABSENT	8
SW-18-CML	9.5031	17.2406	1.871	9.642	11.449	6	ABSENT	SOCIAL	ABSENT	8
SW-18-CML	7.9089	17.2717	2.266	9.365	9.036	8	ABSENT	SOCIAL	ABSENT	8
SW-18-CML	8.9207	17.5044	2.105	9.086	15.458	7	ABSENT	SOCIAL	ABSENT	8
SW-18-CML	6.9724	17.4912	2.93	9.203	11.571	8	ABSENT	SOCIAL	ABSENT	8
SW-18-CML	9.0134	18.5902	1.836	9.788	11.971	6	ABSENT	SOCIAL	ABSENT	8
SW-18-CML	7.4689	17.4274	1.748	7.469	14.44	6	ABSENT	SOCIAL	ABSENT	8
SW-18-CML	9.1618	19.5187	1.468	9.062	12.747	6	ABSENT	SOCIAL	ABSENT	8
SW-18-CML	8.6639	19.5187	1.06	8.664	9.859	3	ABSENT	SOCIAL	ABSENT	8
SW-18-CML	8.6613	19.3648	1.606	9.577	13.661	6	ABSENT	SOCIAL	ABSENT	8
SW-18-CML	6.4356	20.2158	1.565	8.375	6.524	5	ABSENT	SOCIAL	ABSENT	8
SW-18-CML	8.098	19.6464	1.724	9.084	16.055	6	ABSENT	SOCIAL	ABSENT	8
SW-18-CML	7.56	17.2244	1.147	9.018	8.002	5	ABSENT	SOCIAL	ABSENT	8
SW-18-CML	8.0516	18.7584	2.136	9.367	8.205	6	ABSENT	SOCIAL	ABSENT	8
SW-18-CML	8.4374	16.8945	1.067	8.484	14.194	2	ABSENT	SOCIAL	ABSENT	8
SW-19-SE	3.4104	11.043	0.787	3.329	4.466	1	ABSENT	SOCIAL	PRESENT	8
SW-19-SE	3.2153	10.6897	0.788	3.286	4.979	1	ABSENT	SOCIAL	PRESENT	8
SW-19-SE	4.0739	10.3809	0.923	3.962	4.52	1	ABSENT	SOCIAL	PRESENT	8
SW-20-SE	1.776	9.6599	1.147	3.898	9.542	0	ABSENT	SOCIAL	PRESENT	8
SW-20-SE	2.625	10.7614	0.921	3.405	10.68	0	ABSENT	SOCIAL	PRESENT	8
SW-20-SE	4.618	9.6412	0.937	4.627	8.968	0	ABSENT	SOCIAL	PRESENT	8
SW-20-SE	4.4777	9.6478	0.972	4.478	9.411	0	ABSENT	SOCIAL	PRESENT	8
SW-15-CML	4.6454	11.7417	2.291	7.984	4.57	7	ABSENT	TRAVEL	PRESENT	8
SW-15-CML	5.1144	15.5425	2.468	7.705	15.543	7	ABSENT	TRAVEL	PRESENT	8
SW-15-CML	5.1808	11.4908	1.143	7.86	9.83	3	ABSENT	TRAVEL	PRESENT	8
SW-18-CML	7.8163	16.5481	2.576	14.083	8.098	8	ABSENT	TRAVEL	ABSENT	8
SW-18-CML	9.2247	16.8297	1.403	9.225	16.759	4	ABSENT	TRAVEL	ABSENT	8
SW-18-CML	7.0643	18.9474	1.15	9.084	6.971	3	ABSENT	TRAVEL	ABSENT	8
SW-18-CML	9.0838	19.0127	1.66	9.013	11.056	6	ABSENT	TRAVEL	ABSENT	8
SW-18-CML	8.7273	17.11	1.51	8.727	14.469	5	ABSENT	TRAVEL	ABSENT	8
SW-19-SE	1.6196	14.3402	0.995	1.593	5.178	1	ABSENT	TRAVEL	PRESENT	8
SW-4-SE	4.4691	8.5038	0.511	4.545	8.471	0	PRESENT	SOCIAL	PRESENT	8
SW-4-SE	4.6597	9.1642	0.477	4.695	8.571	0	PRESENT	SOCIAL	PRESENT	8
SW-4-SE	5.1625	8.8849	0.382	5.181	8.761	0	PRESENT	SOCIAL	PRESENT	8
SW-4-SE	5.4868	9.3473	0.581	5.512	9.038	0	PRESENT	SOCIAL	PRESENT	8
SW-4-SE	4.4791	8.9636	0.571	4.46	8.929	0	PRESENT	SOCIAL	PRESENT	8
SW-4-SE	5.6203	10.5272	0.488	5.917	10.498	1	PRESENT	SOCIAL	PRESENT	8
SW-4-SE	5.6388	10.1085	0.538	5.674	10.074	0	PRESENT	SOCIAL	PRESENT	8
SW-4-SE	3.2192	9.0063	0.391	3.235	8.932	0	PRESENT	SOCIAL	PRESENT	8
SW-4-SE	3.3333	11.0765	0.579	3.309	10.963	0	PRESENT	SOCIAL	PRESENT	8
SW-4-SE	3.1605	9.037	0.594	3.111	8.691	0	PRESENT	SOCIAL	PRESENT	8
SW-4-SE	3.1804	9.5874	0.512	3.163	9.535	0	PRESENT	SOCIAL	PRESENT	8
SW-4-SE	5.5395	11.5943	0.496	5.515	11.52	0	PRESENT	SOCIAL	PRESENT	8
SW-4-SE	4.2916	10.8322	0.554	4.27	10.822	0	PRESENT	SOCIAL	PRESENT	8
SW-5-SE	4.9064	10.7103	1.039	6.739	4.872	1	PRESENT	SOCIAL	PRESENT	8
SW-5-SE	4.88	10.8385	0.977	6.615	4.816	1	PRESENT	SOCIAL	PRESENT	8
SW-5-SE	6.9654	17.7134	1.377	7.414	15.1	2	PRESENT	SOCIAL	PRESENT	8
SW-7-SE	7.7688	13.1792	0.111	13.318	9.295	1	ABSENT	SOCIAL	PRESENT	8
SW-7-SE	7.278	12.4855	0.092	11.762	9.27	1	ABSENT	SOCIAL	PRESENT	8
SW-44-CML	6.0447	15.599	2.484	7.431	7.236	3	PRESENT	SOCIAL	PRESENT	8
SW-44-CML	5.9394	14.506	2.335	8.353	6.048	3	PRESENT	SOCIAL	PRESENT	8
SW-57-SE	7.1278	8.1382	0.656	7.981	7.335	0	PRESENT	SOCIAL	PRESENT	8
SW-57-SE	7.3834	8.7594	0.789	8.117	8.587	1	PRESENT	SOCIAL	PRESENT	8
SW-57-SE	7.1415	8.1909	0.614	7.586	8.191	1	PRESENT	SOCIAL	PRESENT	8
SW-57-SE	7.7235	8.3974	0.451	7.762	7.827	0	PRESENT	SOCIAL	PRESENT	8
SW-57-SE	5.8716	8.367	0.638	5.872	8.367	0	PRESENT	SOCIAL	PRESENT	8
SW-57-SE	7.1927	8.2202	0.899	7.633	7.633	0	PRESENT	SOCIAL	PRESENT	8
SW-57-SE	7.1927	8.2202	0.566	7.775	7.775	0	PRESENT	SOCIAL	PRESENT	8
SW-57-SE	7.0497	8.2104	0.718	8.21	8.21	1	PRESENT	SOCIAL	PRESENT	8
SW-57-SE	7.3307	9.2	0.847	9.163	9.163	2	PRESENT	SOCIAL	PRESENT	8
SW-57-SE	7.1015	8.0734	0.627	8.086	8.086	1	PRESENT	SOCIAL	PRESENT	8
SW-57-SE	7.3607	8.6048	0.672	8.086	8.605	1	PRESENT	SOCIAL	PRESENT	8
